# Supplementary material for: Metabolomic Profiling of Guadua Species and Its Correlation with Antioxidant and Cytotoxic Activities
Source: PubMed Central journal article supplement (PMC11375805; doi:10.1021/acsomega.3c09114), 2024-08-21
Supplement: ao3c09114_si_001.pdf [file ao3c09114_si_001.pdf]

## ***Supplementary Material***

***for***

### **Metabolomic Profiling of *Guadua* Species and its Correlation with Antioxidant and Cytotoxic Activities**

Luis Carlos Chitiva<sup>a,b</sup>, Paula Rezende-Teixeira<sup>c</sup>, Tiago F. Leão<sup>a</sup>, Hair Santiago Lozano-Puentes<sup>d</sup>, Ximena Londoño<sup>e</sup>, Lucía Ana Díaz-Ariza<sup>d</sup>, Leticia V. Costa-Lotuf<sup>c</sup>, Juliet A. Prieto-Rodríguez<sup>b</sup>, Geison M. Costa<sup>b</sup>, and Ian Castro-Gamboa<sup>a,\*</sup>

<sup>a</sup>*Núcleo de Bioensaios, Biossíntese e Ecofisiologia de Produtos Naturais (NuBBE), Institute of Chemistry, São Paulo State University (UNESP), SP, Araraquara, SP 14800-901, Brazil*

<sup>b</sup>*Grupo de Investigación Fitoquímica Universidad Javeriana (GIFUJ), Department of Chemistry, Faculty of Sciences, Pontificia Universidad Javeriana, Bogotá 110231, Colombia*

<sup>c</sup>*Laboratório de Farmacologia de Produtos Naturais Marinhos, Institute of Biomedical Sciences, University of São Paulo, São Paulo, SP 05508-000, Brazil*

<sup>d</sup>*Laboratorio Asociaciones, Suelo, Planta, Microorganismo (LAMIC), Grupo de Investigación en Agricultura Biológica, Department of Biology, Faculty of Sciences, Pontificia Universidad Javeriana, Bogotá 110231, Colombia*

<sup>e</sup>*Faculty of Agricultural Sciences, Universidad Nacional de Colombia, Palmira 763533, Colombia*

\*Corresponding author.

E-mail address: [ian.castro@unesp.br](mailto:ian.castro@unesp.br) (Ian Castro-Gamboa)

#### **Table of Contents**

1. **Figure S1.** UV spectra of the major peaks found in the BLEs obtained by HPLC-DAD.
2. **Table S1.** Phytochemicals tentatively identified in BLEs using UHPLC-QTOF-MS.
3. **Figure S2.** Chemical structures of the metabolites were found in BLEs.
4. **Figure S3.** MS<sup>2</sup> spectrum match feature of GNPS showing the similarity of fragments patterns of the experimental and library data.
5. **Figure S4.** PCA score plot including Quality Controls (QCs) and all samples from UHPLC-QTOF-MS analysis.
6. **Table S2.** List and information on the environmental variables of collection of the *Guadua* species used for the study.
7. **Table S3.** Comparison of retention times of reference standards between HPLC-DAD and UHPLC-QTOF-MS analyses.
8. **Figure S5.** <sup>1</sup>H-NMR spectra obtained for quercetin.
9. **Figure S6.** <sup>1</sup>H-NMR spectra obtained for rutin.
10. **Table S4.** Parameters used in the GNPS Classical Molecular Networking.

11. **Table S5.** Parameters used in the MZmine 2.53 software for processing the data obtained by UHPLC-QTOF-MS.

12. **Table S6.** Parameters used in the NMRProcFlow software for processing the data obtained by <sup>1</sup>H-NMR.

13. **Figure S7.** Calibration curves obtained for the determination of antioxidant capacity by ABTS and DPPH.

14. References

**Brief description of contents:** (i) UV spectra of the major peaks found in the BLEs obtained by HPLC-DAD; (ii) Phytochemicals tentatively identified in BLEs using UHPLC-QTOF-MS; (iii) Chemical structures of the metabolites were found in BLEs; (iv) MS<sup>2</sup> spectrum match feature of GNPS showing the similarity of fragments patterns of the experimental and library data; (v) PCA score plot including Quality Controls (QCs) and all samples from UHPLC-QTOF-MS analysis; (vi) List and information on the environmental variables of collection of the *Guadua* species used for the study; (vii) Comparison of retention times of reference standards between HPLC-DAD and UHPLC-QTOF-MS analyses; (viii) <sup>1</sup>H-NMR spectra obtained for the reference standards (Quercetin and Rutin); (ix) Calibration curves obtained for the determination of antioxidant capacity by ABTS and DPPH (x) Parameters used in the GNPS Classical Molecular Networking platform, MZmine version 2.53, and NMRProcFlow software for processing the data obtained by UHPLC-QTOF-MS, and <sup>1</sup>H-NMR.

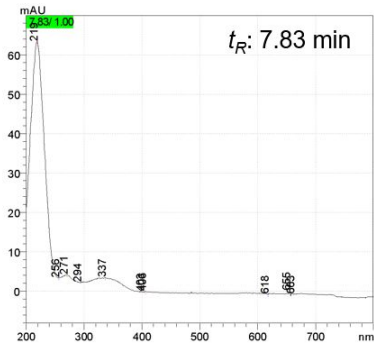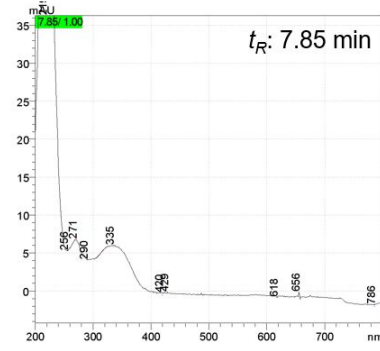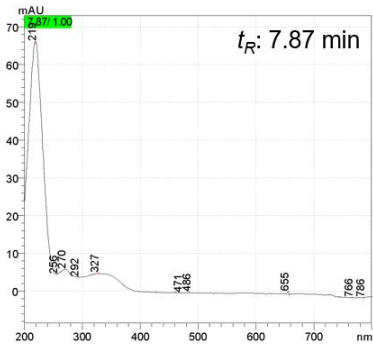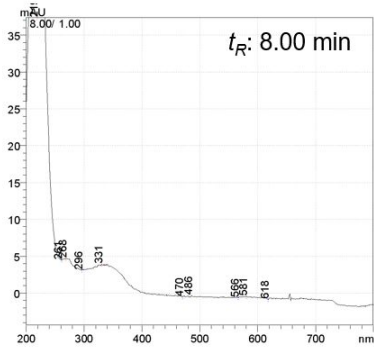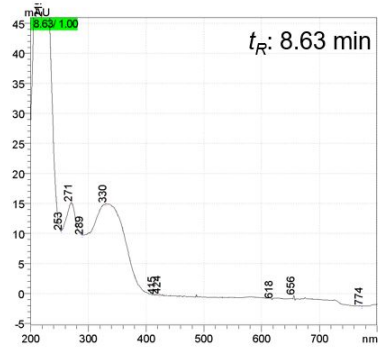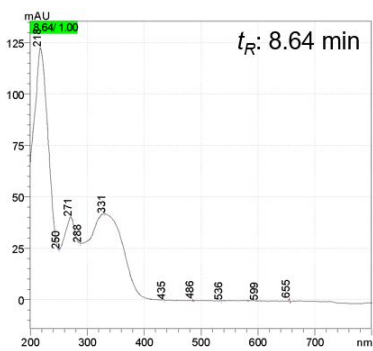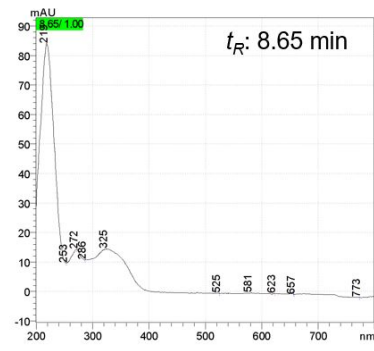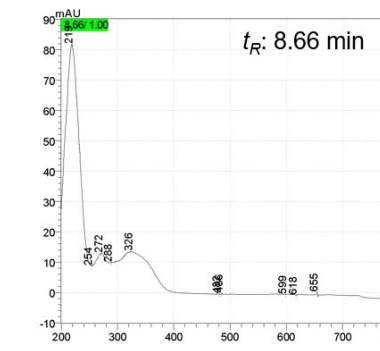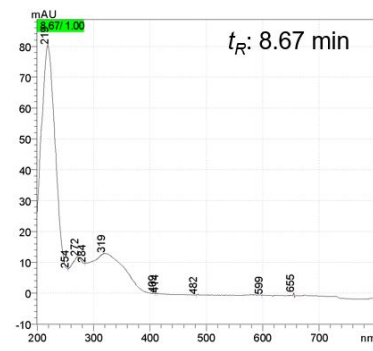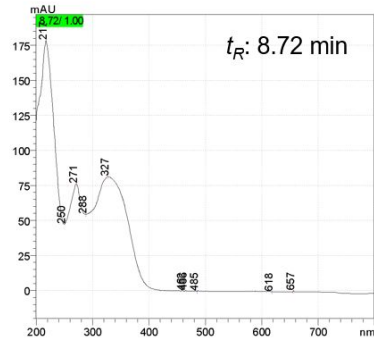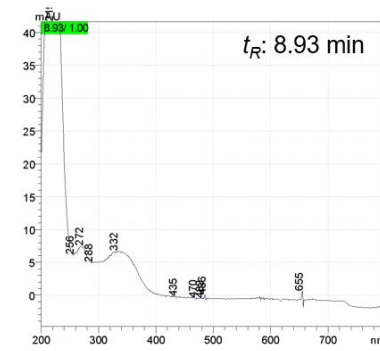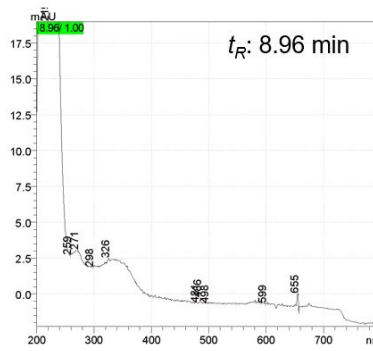

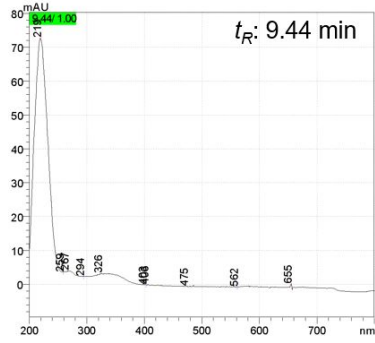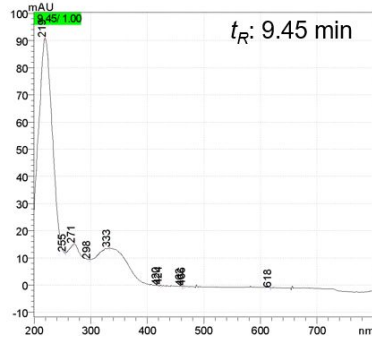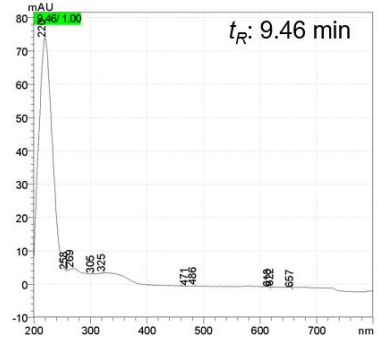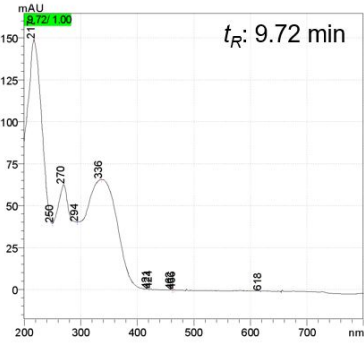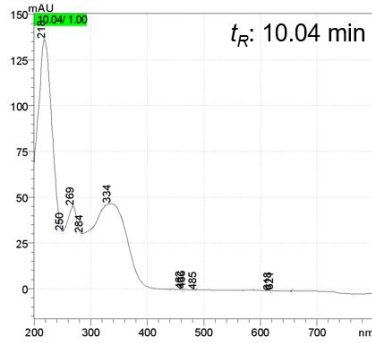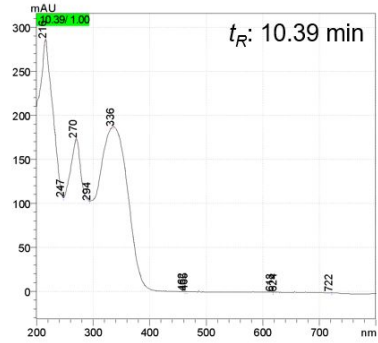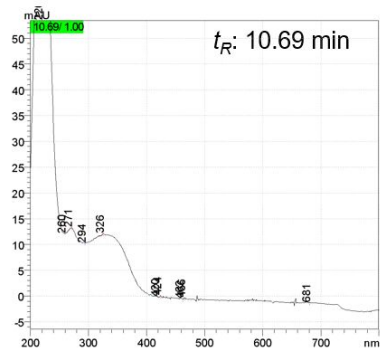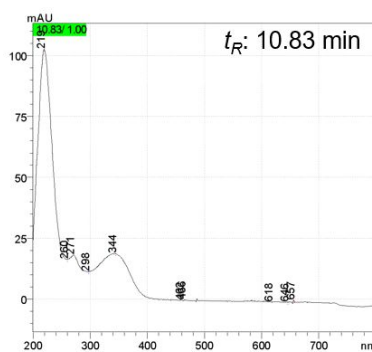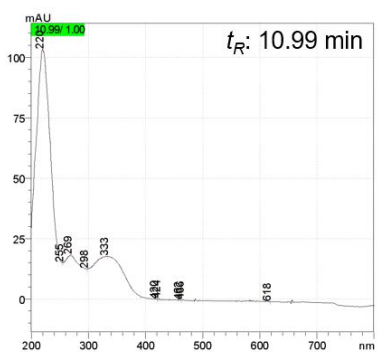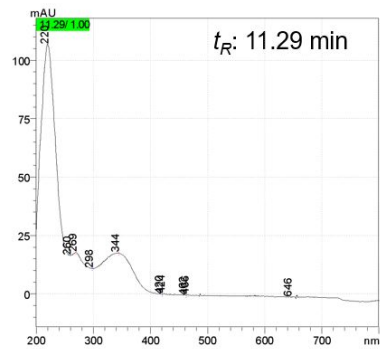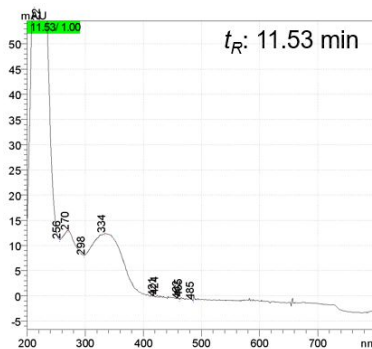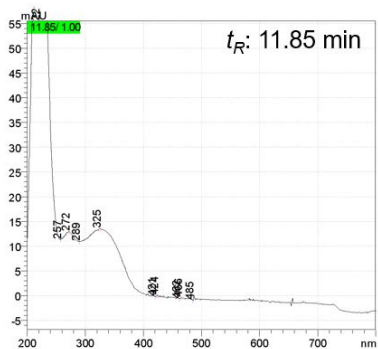

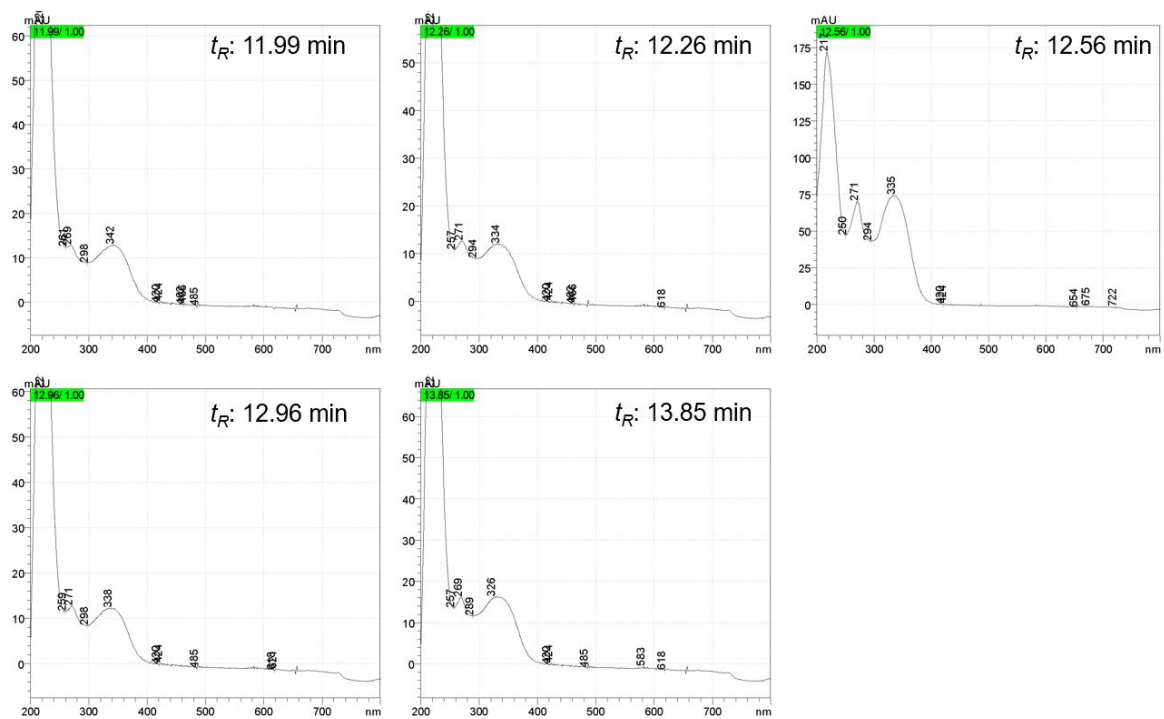

**Figure S1.** UV spectra of the major peaks found in the BLEs obtained by HPLC-DAD. The retention time of each peak and its corresponding spectrum are described in highlighted green ( $t_R/1.00$ ).

**Table S1.** Phytochemicals tentatively identified in BLEs using UHPLC-QTOF-MS.

| Peak | $t_R$<br>(min) | UV $\lambda_{max}$<br>(nm) | Molecular<br>formula                            | Adduct<br>ion      | Calculated<br>mass ( $m/z$ ) | Experimental<br>mass ( $m/z$ ) | Mass<br>error<br>(ppm) | Main fragment ions<br>(MS/MS) | Identification<br>confidence<br>level | Tentative<br>identification   | Chemical class                | Plant species                                                                                                                                                                                                                                                                                   | Reference<br>or<br>Database <sup>a</sup> |
|------|----------------|----------------------------|-------------------------------------------------|--------------------|------------------------------|--------------------------------|------------------------|-------------------------------|---------------------------------------|-------------------------------|-------------------------------|-------------------------------------------------------------------------------------------------------------------------------------------------------------------------------------------------------------------------------------------------------------------------------------------------|------------------------------------------|
| 15   | 0.57           | -                          | C <sub>7</sub> H <sub>12</sub> O <sub>6</sub>   | [M-H] <sup>-</sup> | 191.0551                     | 191.0543                       | -4.2                   | 175, 147, 129, 111            | 2                                     | Quinic acid                   | Organic acid                  | <i>G. aculeata</i><br><i>G. amplexifolia</i><br><i>G. angustifolia</i><br><i>G. angustifolia</i><br>biotype <i>San calixto</i><br><i>G. angustifolia</i> var.<br><i>bicolor</i><br><i>G. incana</i><br><i>G. superba</i><br><i>G. uncinata</i><br><i>G. venezuelae</i><br><i>G. weberbaueri</i> | <sup>1-3</sup>                           |
| 16   | 1.20           | Low<br>intensity           | C <sub>16</sub> H <sub>18</sub> O <sub>9</sub>  | [M-H] <sup>-</sup> | 353.0878                     | 353.0861                       | -4.8                   | 191, 179, 155, 135            | 3                                     | Not identified                | Cinnamic acid and derivatives | <i>G. superba</i><br><i>G. weberbaueri</i>                                                                                                                                                                                                                                                      |                                          |
| 17   | 1.94           | Low<br>intensity           | C <sub>15</sub> H <sub>16</sub> O <sub>10</sub> | [M-H] <sup>-</sup> | 355.0670                     | 355.0669                       | -0.3                   | 209, 191, 163, 147, 129       | 3                                     | Not identified                | Cinnamic acid and derivatives | <i>G. aculeata</i><br><i>G. amplexifolia</i><br><i>G. angustifolia</i><br><i>G. incana</i>                                                                                                                                                                                                      |                                          |
| 18   | 1.98           | Low<br>intensity           | C <sub>17</sub> H <sub>20</sub> O <sub>9</sub>  | [M-H] <sup>-</sup> | 367.1034                     | 367.1024                       | -2.7                   | 207, 193, 134                 | 2                                     | <i>O</i> -Feruloylquinic acid | Cinnamic acid and derivatives | <i>G. angustifolia</i><br><i>G. superba</i><br><i>G. uncinata</i>                                                                                                                                                                                                                               | <sup>3-7</sup> and<br>GNPS               |
| 19   | 2.04           | 290 <sup>sh</sup> ,<br>310 | C <sub>25</sub> H <sub>24</sub> O <sub>12</sub> | [M-H] <sup>-</sup> | 515.1195                     | 515.1193                       | -0.4                   | 353, 191, 179, 137            | 2                                     | Dicaffeoylquinic acid         | Cinnamic acid and derivatives | <i>G. aculeata</i><br><i>G. superba</i><br><i>G. venezuelae</i><br><i>G. weberbaueri</i>                                                                                                                                                                                                        | <sup>3</sup> and<br>GNPS                 |

|    |      |                            |                                                 |                    |          |          |      |                         |   |                                |                           |                    |                                                                                                                                                                                                                                                |                                |
|----|------|----------------------------|-------------------------------------------------|--------------------|----------|----------|------|-------------------------|---|--------------------------------|---------------------------|--------------------|------------------------------------------------------------------------------------------------------------------------------------------------------------------------------------------------------------------------------------------------|--------------------------------|
| 20 | 2.33 | Low intensity              | C <sub>16</sub> H <sub>18</sub> O <sub>8</sub>  | [M-H] <sup>-</sup> | 337.0928 | 337.0945 | 5.0  | 191, 173, 164, 119      | 2 | O-Coumaroylquinic acid         | Cinnamic acid derivatives | and                | <i>G. aculeata</i><br><i>G. superba</i><br><i>G. venezuelae</i><br><i>G. weberbaueri</i>                                                                                                                                                       | <sup>1,3,8,9</sup> and<br>GNPS |
| 21 | 2.36 | 270, 327                   | C <sub>27</sub> H <sub>30</sub> O <sub>16</sub> | [M-H] <sup>-</sup> | 609.1461 | 609.1466 | 0.8  | 547, 519, 489, 429, 399 | 3 | Luteolin hexoside pentoside    | 6-C-<br>8-C-              | Flavone glycosides | <i>G. amplexifolia</i><br><i>G. angustifolia</i><br><i>G. angustifolia</i><br>biotype <i>San calixto</i><br><i>G. angustifolia</i> var.<br><i>bicolor</i><br><i>G. incana</i><br><i>G. uncinata</i>                                            |                                |
| 2  | 2.46 | 292 <sup>sh</sup> ,<br>326 | C <sub>16</sub> H <sub>18</sub> O <sub>9</sub>  | [M-H] <sup>-</sup> | 353.0878 | 353.0864 | -4.0 | 191, 179, 135           | 1 | Chlorogenic acid <sup>st</sup> | Cinnamic acid derivatives | and                | <i>G. aculeata</i><br><i>G. superba</i><br><i>G. venezuelae</i><br><i>G. weberbaueri</i>                                                                                                                                                       | <sup>10-13</sup> and<br>GNPS   |
| 22 | 2.51 | 274, 336                   | C <sub>21</sub> H <sub>20</sub> O <sub>10</sub> | [M-H] <sup>-</sup> | 431.0983 | 431.0981 | -0.5 | 387, 341, 311, 179      | 3 | Not identified                 | Flavone glycosides        |                    | <i>G. aculeata</i><br><i>G. amplexifolia</i><br><i>G. angustifolia</i><br><i>G. angustifolia</i><br>biotype <i>San calixto</i><br><i>G. angustifolia</i> var.<br><i>bicolor</i><br><i>G. incana</i><br><i>G. superba</i><br><i>G. uncinata</i> |                                |

|    |      |          |                                                 |                    |          |          |      |                               |   |                           |                            |                                                                                                                                                                                                                   |                             |
|----|------|----------|-------------------------------------------------|--------------------|----------|----------|------|-------------------------------|---|---------------------------|----------------------------|-------------------------------------------------------------------------------------------------------------------------------------------------------------------------------------------------------------------|-----------------------------|
| 23 | 2.68 | 272, 325 | C <sub>27</sub> H <sub>30</sub> O <sub>15</sub> | [M-H] <sup>-</sup> | 593.1511 | 593.1513 | 0.3  | 503, 473, 383, 353, 297       | 2 | Vicenin 2                 | Flavone glycosides         | <i>G. amplexifolia</i><br><i>G. angustifolia</i><br><i>G. angustifolia</i><br>biotype <i>San calixto</i><br><i>G. incana</i><br><i>G. superba</i><br><i>G. uncinata</i><br><i>G. venezuelae</i>                   | <sup>1,14</sup> and<br>GNPS |
| 24 | 2.70 | 269, 325 | C <sub>21</sub> H <sub>20</sub> O <sub>11</sub> | [M-H] <sup>-</sup> | 447.0932 | 447.0931 | -0.2 | 327, 299, 285, 133, 109       | 3 | Not identified            | Flavone glycosides         | <i>G. amplexifolia</i><br><i>G. angustifolia</i><br><i>G. angustifolia</i> var.<br><i>bicolor</i><br><i>G. incana</i><br><i>G. uncinata</i>                                                                       |                             |
| 25 | 2.71 | 268, 337 | C <sub>27</sub> H <sub>30</sub> O <sub>15</sub> | [M-H] <sup>-</sup> | 593.1511 | 593.1517 | 1.0  | 457, 383, 353, 297            | 2 | Apigenin<br>digalactoside | 6,8-<br>Flavone glycosides | <i>G. amplexifolia</i><br><i>G. angustifolia</i><br><i>G. angustifolia</i><br>biotype <i>San calixto</i><br><i>G. incana</i><br><i>G. superba</i><br><i>G. uncinata</i><br><i>G. venezuelae</i>                   | <sup>8</sup> and<br>GNPS    |
|    |      |          |                                                 | [M+H] <sup>+</sup> | 595.1668 | 595.1660 | -1.3 | 541, 481, 457, 379, 325, 295  |   |                           |                            |                                                                                                                                                                                                                   |                             |
| 26 | 2.71 | 267, 326 | C <sub>26</sub> H <sub>28</sub> O <sub>14</sub> | [M-H] <sup>-</sup> | 563.1406 | 563.1411 | 0.9  | 473, 443, 383, 353, 325, 2.97 | 3 | Not identified            | Flavone glycosides         | <i>G. amplexifolia</i><br><i>G. angustifolia</i><br><i>G. angustifolia</i> var.<br><i>bicolor</i><br><i>G. incana</i><br><i>G. superba</i><br><i>G. uncinata</i><br><i>G. venezuelae</i><br><i>G. weberbaueri</i> |                             |



|    |      |          |                                                 |                    |          |          |      |                              |   |                            |                               |                                                                                                                                                                                                                       |                       |
|----|------|----------|-------------------------------------------------|--------------------|----------|----------|------|------------------------------|---|----------------------------|-------------------------------|-----------------------------------------------------------------------------------------------------------------------------------------------------------------------------------------------------------------------|-----------------------|
| 3  | 2.74 | 311      | C <sub>9</sub> H <sub>8</sub> O <sub>4</sub>    | [M-H] <sup>-</sup> | 179.0349 | 179.0352 | 1.7  | 135, 119                     | 1 | Caffeic acid <sup>st</sup> | Cinnamic acid and derivatives | <i>G. aculeata</i><br><i>G. amplexifolia</i><br><i>G. angustifolia</i><br><i>G. angustifolia</i><br>biotype <i>San calixto</i><br><i>G. incana</i><br><i>G. superba</i><br><i>G. uncinata</i><br><i>G. venezuelae</i> | 10,11,15              |
| 27 | 2.77 | 271, 333 | C <sub>26</sub> H <sub>28</sub> O <sub>14</sub> | [M-H] <sup>-</sup> | 563.1406 | 563.1410 | 0.7  | 445, 355, 325, 297           | 3 | Not identified             | Flavone glycosides            | <i>G. angustifolia</i><br><i>G. angustifolia</i><br>biotype <i>San calixto</i><br><i>G. angustifolia</i> var. <i>bicolor</i><br><i>G. incana</i><br><i>G. superba</i><br><i>G. uncinata</i>                           |                       |
| 28 | 2.80 | 269, 334 | C <sub>26</sub> H <sub>28</sub> O <sub>14</sub> | [M-H] <sup>-</sup> | 563.1416 | 563.1415 | -0.2 | 473, 443, 401, 383, 353, 311 | 3 | Not identified             | Flavone glycosides            | <i>G. aculeata</i><br><i>G. amplexifolia</i><br><i>G. angustifolia</i><br><i>G. angustifolia</i><br>biotype <i>San calixto</i><br><i>G. incana</i><br><i>G. superba</i><br><i>G. uncinata</i><br><i>G. venezuelae</i> |                       |
| 29 | 2.87 | 265, 341 | C <sub>27</sub> H <sub>30</sub> O <sub>14</sub> | [M-H] <sup>-</sup> | 577.1562 | 577.1565 | 0.5  | 413, 341, 293, 175           | 2 | Vitexin rhamnoside         | 2"-O- Flavone glycosides      | <i>G. angustifolia</i><br><i>G. angustifolia</i><br>biotype <i>San calixto</i><br><i>G. angustifolia</i> var. <i>bicolor</i>                                                                                          | <sup>1</sup> and GNPS |
|    |      |          |                                                 | [M+H] <sup>+</sup> | 579.1719 | 579.171  | -1.6 | 433, 415, 367, 313, 283      |   |                            |                               |                                                                                                                                                                                                                       |                       |

|           |      |          |                                                 |                    |          |          |      |                                 |   |                                     |                    |                                               |                         |
|-----------|------|----------|-------------------------------------------------|--------------------|----------|----------|------|---------------------------------|---|-------------------------------------|--------------------|-----------------------------------------------|-------------------------|
|           |      |          |                                                 |                    |          |          |      |                                 |   |                                     |                    | <i>G. incana</i>                              |                         |
|           |      |          |                                                 |                    |          |          |      |                                 |   |                                     |                    | <i>G. superba</i>                             |                         |
|           |      |          |                                                 |                    |          |          |      |                                 |   |                                     |                    | <i>G. uncinata</i>                            |                         |
| <b>30</b> | 2.88 | 269, 342 | C <sub>27</sub> H <sub>30</sub> O <sub>15</sub> | [M-H] <sup>-</sup> | 593.1511 | 593.1519 | 1.3  | 473, 431, 353, 311,<br>297, 282 | 2 | Saponarin<br>or<br>Isosaponarin     | Flavone glycosides | <i>G. amplexifolia</i>                        | <sup>1,8</sup> and      |
|           |      |          |                                                 |                    |          |          |      |                                 |   |                                     |                    | <i>G. angustifolia</i>                        | GNPS                    |
|           |      |          |                                                 |                    |          |          |      |                                 |   |                                     |                    | <i>G. angustifolia</i> var.<br><i>bicolor</i> |                         |
|           |      |          |                                                 |                    |          |          |      |                                 |   |                                     |                    | <i>G. incana</i>                              |                         |
|           |      |          |                                                 |                    |          |          |      |                                 |   |                                     |                    | <i>G. superba</i>                             |                         |
|           |      |          |                                                 |                    |          |          |      |                                 |   |                                     |                    | <i>G. uncinata</i>                            |                         |
|           |      |          |                                                 |                    |          |          |      |                                 |   |                                     |                    | <i>G. venezuelae</i>                          |                         |
|           |      |          |                                                 |                    |          |          |      |                                 |   |                                     |                    | <i>G. weberbaueri</i>                         |                         |
| <b>31</b> | 2.91 | 271, 335 | C <sub>26</sub> H <sub>28</sub> O <sub>14</sub> | [M-H] <sup>-</sup> | 563.1406 | 563.1401 | -0.9 | 473, 443, 383, 353,<br>325, 297 | 2 | Schaftoside<br>or<br>Isoschaftoside | Flavone glycosides | <i>G. amplexifolia</i>                        | <sup>1,3,4,8,9,16</sup> |
|           |      |          |                                                 |                    |          |          |      |                                 |   |                                     |                    | <i>G. angustifolia</i>                        | and GNPS                |
|           |      |          |                                                 |                    |          |          |      |                                 |   |                                     |                    | <i>G. angustifolia</i>                        |                         |
|           |      |          |                                                 |                    |          |          |      |                                 |   |                                     |                    | biotype <i>San calixto</i>                    |                         |
|           |      |          |                                                 |                    |          |          |      |                                 |   |                                     |                    | <i>G. angustifolia</i> var.<br><i>bicolor</i> |                         |
|           |      |          |                                                 |                    |          |          |      |                                 |   |                                     |                    | <i>G. incana</i>                              |                         |
|           |      |          |                                                 |                    |          |          |      |                                 |   |                                     |                    | <i>G. uncinata</i>                            |                         |
|           |      |          |                                                 |                    |          |          |      |                                 |   |                                     |                    | <i>G. venezuelae</i>                          |                         |
|           |      |          |                                                 |                    |          |          |      |                                 |   |                                     |                    | <i>G. weberbaueri</i>                         |                         |
| <b>32</b> | 3.13 | 273, 339 | C <sub>26</sub> H <sub>28</sub> O <sub>14</sub> | [M+H] <sup>+</sup> | 565.1562 | 565.1564 | 0.4  | 525, 481, 405, 337,<br>295      | 3 | Vicenin 1 or Vicenin<br>3           | Flavone glycosides | <i>G. amplexifolia</i>                        |                         |
|           |      |          |                                                 |                    |          |          |      |                                 |   |                                     |                    | <i>G. angustifolia</i>                        |                         |
|           |      |          |                                                 |                    |          |          |      |                                 |   |                                     |                    | <i>G. angustifolia</i> var.<br><i>bicolor</i> |                         |
|           |      |          |                                                 |                    |          |          |      |                                 |   |                                     |                    | <i>G. incana</i>                              |                         |
|           |      |          |                                                 |                    |          |          |      |                                 |   |                                     |                    | <i>G. superba</i>                             |                         |
|           |      |          |                                                 |                    |          |          |      |                                 |   |                                     |                    | <i>G. uncinata</i>                            |                         |
|           |      |          |                                                 |                    |          |          |      |                                 |   |                                     |                    | <i>G. venezuelae</i>                          |                         |
|           |      |          |                                                 |                    |          |          |      |                                 |   |                                     |                    | <i>G. weberbaueri</i>                         |                         |

|    |      |                  |                                                 |                    |          |          |     |                            |   |                                       |                         |                    |                                                                                                                                                                                                                       |                           |
|----|------|------------------|-------------------------------------------------|--------------------|----------|----------|-----|----------------------------|---|---------------------------------------|-------------------------|--------------------|-----------------------------------------------------------------------------------------------------------------------------------------------------------------------------------------------------------------------|---------------------------|
| 33 | 3.16 | 270, 344         | C <sub>28</sub> H <sub>32</sub> O <sub>16</sub> | [M-H] <sup>-</sup> | 623.1617 | 623.1617 | 0.0 | 504, 443, 353, 323         | 3 | Isoscoparin<br>hexoside               | 2"-O-                   | Flavone glycosides | <i>G. amplexifolia</i><br><i>G. angustifolia</i><br><i>G. angustifolia</i><br>biotype <i>San calixto</i><br><i>G. angustifolia</i> var.<br><i>bicolor</i><br><i>G. incana</i><br><i>G. uncinata</i>                   |                           |
| 34 | 3.18 | 271, 342         | C <sub>28</sub> H <sub>32</sub> O <sub>15</sub> | [M+H] <sup>+</sup> | 609.1824 | 609.1824 | 0.0 | 430, 393, 327, 297,<br>267 | 3 | Spinosin<br>Isospinosin               | or                      | Flavone glycosides | <i>G. amplexifolia</i><br><i>G. angustifolia</i><br><i>G. angustifolia</i> var.<br><i>bicolor</i><br><i>G. incana</i><br><i>G. superba</i><br><i>G. uncinata</i><br><i>G. venezuelae</i><br><i>G. weberbaueri</i>     |                           |
| 8  | 3.20 | Low<br>intensity | C <sub>9</sub> H <sub>8</sub> O <sub>3</sub>    | [M-H] <sup>-</sup> | 163.0400 | 163.0400 | 0.0 | 119                        | 1 | <i>p</i> -Coumaric acid <sup>st</sup> | Cinnamic<br>derivatives | acid<br>and        | <i>G. aculeata</i><br><i>G. amplexifolia</i><br><i>G. angustifolia</i><br><i>G. angustifolia</i><br>biotype <i>San calixto</i><br><i>G. incana</i><br><i>G. superba</i><br><i>G. uncinata</i><br><i>G. venezuelae</i> | <sup>17</sup> and<br>GNPS |

|    |      |          |                                                 |                    |          |          |      |                         |   |                                                |      |                     |                                                                                                                                                                                                                   |                           |
|----|------|----------|-------------------------------------------------|--------------------|----------|----------|------|-------------------------|---|------------------------------------------------|------|---------------------|-------------------------------------------------------------------------------------------------------------------------------------------------------------------------------------------------------------------|---------------------------|
| 35 | 3.23 | 270, 341 | C <sub>27</sub> H <sub>30</sub> O <sub>14</sub> | [M-H] <sup>-</sup> | 577.1562 | 577.1569 | 1.2  | 533, 472, 413, 353, 293 | 2 | Violanthin<br>Isoviolanthin                    | or   | Flavone glycosides  | <i>G. amplexifolia</i><br><i>G. angustifolia</i><br><i>G. angustifolia</i> var.<br><i>bicolor</i><br><i>G. incana</i><br><i>G. superba</i><br><i>G. uncinata</i><br><i>G. venezuelae</i><br><i>G. weberbaueri</i> | <sup>18</sup>             |
| 36 | 3.24 | 269, 332 | C <sub>27</sub> H <sub>30</sub> O <sub>15</sub> | [M-H] <sup>-</sup> | 593.1511 | 593.1512 | 0.2  | 285, 218, 151           | 2 | Kaempferol<br>neohesperidoside                 | 7-O- | Flavonol glycosides | <i>G. amplexifolia</i><br><i>G. angustifolia</i><br><i>G. angustifolia</i><br>biotype <i>San calixto</i><br><i>G. angustifolia</i> var.<br><i>bicolor</i><br><i>G. incana</i><br><i>G. uncinata</i>               | <sup>18</sup> and<br>GNPS |
| 37 | 3.28 | 270, 325 | C <sub>33</sub> H <sub>40</sub> O <sub>19</sub> | [M-H] <sup>-</sup> | 739.2091 | 739.209  | -0.1 | 593, 431, 281           | 3 | Kaempferol<br>disaccharoside-7-O-<br>pentoside | 3-O- | Flavonol glycosides | <i>G. amplexifolia</i><br><i>G. angustifolia</i><br><i>G. angustifolia</i><br>biotype <i>San calixto</i><br><i>G. angustifolia</i> var.<br><i>bicolor</i><br><i>G. incana</i><br><i>G. uncinata</i>               |                           |

|           |      |          |                                                 |                    |          |          |      |                                 |   |                              |      |                     |                                                                                                                                                                                                                                              |
|-----------|------|----------|-------------------------------------------------|--------------------|----------|----------|------|---------------------------------|---|------------------------------|------|---------------------|----------------------------------------------------------------------------------------------------------------------------------------------------------------------------------------------------------------------------------------------|
| <b>38</b> | 3.28 | 270, 326 | C <sub>27</sub> H <sub>30</sub> O <sub>15</sub> | [M+H] <sup>+</sup> | 595.1668 | 595.1667 | -0.2 | 449, 287                        | 3 | Kaempferol<br>disaccharoside | 3-O- | Flavonol glycosides | <i>G. amplexifolia</i><br><i>G. angustifolia</i><br><i>G. angustifolia</i><br>biotype <i>San calixto</i><br><i>G. angustifolia</i> var.<br><i>bicolor</i><br><i>G. incana</i><br><i>G. uncinata</i>                                          |
| <b>39</b> | 3.35 | 272, 326 | C <sub>21</sub> H <sub>18</sub> O <sub>13</sub> | [M-H] <sup>-</sup> | 477.0674 | 477.0675 | 0.2  | 431, 301, 179                   | 3 | Quercetin<br>hexoside        | 3-O- | Flavonol glycosides | <i>G. amplexifolia</i><br><i>G. angustifolia</i><br><i>G. angustifolia</i> var.<br><i>bicolor</i><br><i>G. incana</i><br><i>G. superba</i><br><i>G. uncinata</i><br><i>G. venezuelae</i><br><i>G. weberbaueri</i>                            |
| <b>40</b> | 3.37 | 270, 325 | C <sub>21</sub> H <sub>20</sub> O <sub>12</sub> | [M-H] <sup>-</sup> | 463.0882 | 463.0880 | -0.4 | 372, 300, 271, 255,<br>243, 151 | 2 | Hyperoside                   |      | Flavonol glycosides | <i>G. aculeata</i><br><i>G. angustifolia</i><br><i>G. angustifolia</i><br>biotype <i>San calixto</i><br><i>G. angustifolia</i> var.<br><i>bicolor</i><br><i>G. incana</i><br><i>G. superba</i><br><i>G. uncinata</i><br><i>G. venezuelae</i> |

|    |      |          |                                                 |                    |          |          |      |                                 |   |                            |       |                     |                                                                                                                                                                                                                                                                           |
|----|------|----------|-------------------------------------------------|--------------------|----------|----------|------|---------------------------------|---|----------------------------|-------|---------------------|---------------------------------------------------------------------------------------------------------------------------------------------------------------------------------------------------------------------------------------------------------------------------|
| 41 | 3.41 | 271, 329 | C <sub>28</sub> H <sub>32</sub> O <sub>17</sub> | [M-H] <sup>-</sup> | 639.1566 | 639.1570 | 0.6  | 403, 328, 313, 285,<br>270, 242 | 3 | Isorhamnetin<br>hexoside   | 3,4'- | Flavonol glycosides | <i>G. amplexifolia</i><br><i>G. angustifolia</i><br><i>G. angustifolia</i> var.<br><i>bicolor</i><br><i>G. incana</i><br><i>G. superba</i><br><i>G. uncinata</i><br><i>G. venezuelae</i><br><i>G. weberbaueri</i>                                                         |
| 42 | 3.54 | 271, 344 | C <sub>27</sub> H <sub>30</sub> O <sub>14</sub> | [M-H] <sup>-</sup> | 577.1562 | 577.1561 | -0.2 | 269, 117                        | 3 | Apigenin<br>disaccharoside | 7-O-  | Flavone glycosides  | <i>G. amplexifolia</i><br><i>G. angustifolia</i><br><i>G. angustifolia</i><br>biotype <i>San calixto</i><br><i>G. angustifolia</i> var.<br><i>bicolor</i><br><i>G. incana</i><br><i>G. uncinata</i><br><i>G. venezuelae</i>                                               |
| 43 | 3.56 | 269, 342 | C <sub>27</sub> H <sub>30</sub> O <sub>14</sub> | [M+H] <sup>+</sup> | 579.1719 | 579.1718 | -0.2 | 433, 363, 271, 153              | 3 | Apigenin<br>disaccharoside | 7-O-  | Flavone glycosides  | <i>G. amplexifolia</i><br><i>G. angustifolia</i><br><i>G. angustifolia</i><br>biotype <i>San calixto</i><br><i>G. angustifolia</i> var.<br><i>bicolor</i><br><i>G. incana</i><br><i>G. superba</i><br><i>G. uncinata</i><br><i>G. venezuelae</i><br><i>G. weberbaueri</i> |

|    |      |          |                                                 |                    |          |          |      |                    |   |                             |                            |                                                                                                                                                                                                                                                  |
|----|------|----------|-------------------------------------------------|--------------------|----------|----------|------|--------------------|---|-----------------------------|----------------------------|--------------------------------------------------------------------------------------------------------------------------------------------------------------------------------------------------------------------------------------------------|
| 44 | 3.58 | 268, 331 | C <sub>22</sub> H <sub>22</sub> O <sub>11</sub> | [M-H] <sup>-</sup> | 461.1089 | 461.1087 | -0.4 | 415, 341, 313, 298 | 3 | Not identified              | Flavone glycosides         | <i>G. amplexifolia</i><br><i>G. angustifolia</i><br><i>G. angustifolia</i><br>biotype <i>San calixto</i><br><i>G. angustifolia</i> var.<br><i>bicolor</i><br><i>G. incana</i><br><i>G. uncinata</i><br><i>G. venezuelae</i>                      |
| 45 | 3.59 | 270, 325 | C <sub>28</sub> H <sub>34</sub> O <sub>15</sub> | [M-H] <sup>-</sup> | 609.1824 | 609.1843 | 3.1  | 325, 301, 286, 151 | 3 | Hesperidin                  | Flavanone glycoside        | <i>G. amplexifolia</i><br><i>G. angustifolia</i><br><i>G. angustifolia</i><br>biotype <i>San calixto</i><br><i>G. angustifolia</i> var.<br><i>bicolor</i><br><i>G. incana</i><br><i>G. uncinata</i>                                              |
| 46 | 3.61 | 271, 344 | C <sub>28</sub> H <sub>32</sub> O <sub>15</sub> | [M+H] <sup>+</sup> | 609.1826 | 609.1810 | -2.6 | 463, 301, 286, 258 | 3 | Diosmetin<br>disaccharoside | 7-O-<br>Flavone glycosides | <i>G. amplexifolia</i><br><i>G. angustifolia</i><br><i>G. angustifolia</i><br>biotype <i>San calixto</i><br><i>G. angustifolia</i> var.<br><i>bicolor</i><br><i>G. incana</i><br><i>G. superba</i><br><i>G. uncinata</i><br><i>G. venezuelae</i> |

|    |      |          |                                                 |                    |          |          |      |                              |   |                                                        |                     |                                                                                                                                                                                                                                              |
|----|------|----------|-------------------------------------------------|--------------------|----------|----------|------|------------------------------|---|--------------------------------------------------------|---------------------|----------------------------------------------------------------------------------------------------------------------------------------------------------------------------------------------------------------------------------------------|
| 47 | 3.64 | 269, 326 | C <sub>28</sub> H <sub>32</sub> O <sub>16</sub> | [M-H] <sup>-</sup> | 623.1617 | 623.1620 | 0.5  | 329, 314, 299, 271, 243, 187 | 3 | Isorhamnetin<br>3-O-<br>hexoside-6"-<br>disaccharoside | Flavonol glycosides | <i>G. aculeata</i><br><i>G. angustifolia</i><br><i>G. angustifolia</i><br>biotype <i>San calixto</i><br><i>G. angustifolia</i> var.<br><i>bicolor</i><br><i>G. incana</i><br><i>G. superba</i><br><i>G. uncinata</i><br><i>G. venezuelae</i> |
| 48 | 3.73 | 265, 341 | C <sub>27</sub> H <sub>30</sub> O <sub>15</sub> | [M-H] <sup>-</sup> | 593.1511 | 593.1512 | 0.2  | 473, 431, 353, 341, 311, 283 | 3 | Apigenin<br>6-C-<br>hexoside-7-O-<br>hexoside          | Flavone glycosides  | <i>G. amplexifolia</i><br><i>G. angustifolia</i><br><i>G. angustifolia</i><br>biotype <i>San calixto</i><br><i>G. angustifolia</i> var.<br><i>bicolor</i><br><i>G. incana</i><br><i>G. uncinata</i><br><i>G. venezuelae</i>                  |
|    |      |          |                                                 | [M+H] <sup>+</sup> | 595.1668 | 595.1667 | -0.2 | 415, 379, 337, 313, 283, 165 |   |                                                        |                     |                                                                                                                                                                                                                                              |
| 49 | 4.47 | 264, 356 | C <sub>15</sub> H <sub>10</sub> O <sub>6</sub>  | [M-H] <sup>-</sup> | 285.0404 | 285.0403 | -0.4 | 199, 169, 151, 133           | 2 | Luteolin                                               | Flavone aglycones   | <i>G. aculeata</i><br><i>G. incana</i><br><i>G. superba</i><br><i>G. uncinata</i><br><i>G. venezuelae</i><br><i>G. weberbaueri</i>                                                                                                           |
| 50 | 4.57 | 270, 319 | C <sub>15</sub> H <sub>12</sub> O <sub>3</sub>  | [M-H] <sup>-</sup> | 239.0713 | 239.0699 | -5.9 | 211, 195, 179, 135           | 3 | 6-Hidroxyflavanone                                     | Flavone aglycones   | <i>G. amplexifolia</i><br><i>G. angustifolia</i><br><i>G. angustifolia</i><br>biotype <i>San calixto</i><br><i>G. angustifolia</i> var.                                                                                                      |



|           |      |          |                                                 |                    |          |          |     |                            |   |                                   |                                    |                                                                                                                                                                                                                |              |
|-----------|------|----------|-------------------------------------------------|--------------------|----------|----------|-----|----------------------------|---|-----------------------------------|------------------------------------|----------------------------------------------------------------------------------------------------------------------------------------------------------------------------------------------------------------|--------------|
|           |      |          |                                                 |                    |          |          |     |                            |   |                                   | <i>bicolor</i><br><i>G. incana</i> |                                                                                                                                                                                                                |              |
| <b>51</b> | 4.88 | 264, 329 | C <sub>23</sub> H <sub>24</sub> O <sub>12</sub> | [M-H] <sup>-</sup> | 491.1195 | 491.1198 | 0.6 | 461, 328, 313, 285,<br>226 | 2 | Tricin 7-O-glucoside              | Flavone glycosides                 | <i>G. aculeata</i><br><i>G. amplexifolia</i><br><i>G. angustifolia</i><br><i>G. angustifolia</i> var.<br><i>bicolor</i><br><i>G. incana</i><br><i>G. superba</i><br><i>G. uncinata</i><br><i>G. venezuelae</i> | <sup>8</sup> |
| <b>52</b> | 4.92 | 264, 335 | C <sub>27</sub> H <sub>32</sub> O <sub>14</sub> | [M-H] <sup>-</sup> | 579.1719 | 579.1720 | 0.2 | 271, 177, 151, 119         | 3 | Naringenin-7-O-<br>disaccharoside | Flavanone glycosides               | <i>G. amplexifolia</i><br><i>G. angustifolia</i><br><i>G. angustifolia</i><br>biotype <i>San calixto</i><br><i>G. angustifolia</i> var.<br><i>bicolor</i><br><i>G. incana</i><br><i>G. uncinata</i>            |              |

|    |      |          |                                                 |                    |          |          |     |                    |   |                               |                      |                                                                                                                                                                                                                                                                                                 |
|----|------|----------|-------------------------------------------------|--------------------|----------|----------|-----|--------------------|---|-------------------------------|----------------------|-------------------------------------------------------------------------------------------------------------------------------------------------------------------------------------------------------------------------------------------------------------------------------------------------|
| 53 | 4.95 | 263, 334 | C <sub>21</sub> H <sub>22</sub> O <sub>10</sub> | [M-H] <sup>-</sup> | 433.1140 | 433.1145 | 1.2 | 271, 151, 119      | 3 | Naringenin-7-O-hexoside       | Flavanone glycosides | <i>G. aculeata</i><br><i>G. amplexifolia</i><br><i>G. angustifolia</i><br><i>G. angustifolia</i><br>biotype <i>San calixto</i><br><i>G. angustifolia</i> var.<br><i>bicolor</i><br><i>G. incana</i><br><i>G. superba</i><br><i>G. uncinata</i><br><i>G. venezuelae</i><br><i>G. weberbaueri</i> |
| 54 | 4.97 | 271, 358 | C <sub>15</sub> H <sub>10</sub> O <sub>5</sub>  | [M-H] <sup>-</sup> | 269.0455 | 269.0460 | 1.9 | 227, 181, 151, 117 | 2 | Apigenin                      | Flavone aglycones    | <i>G. incana</i><br><i>G. superba</i><br><i>G. uncinata</i><br><i>G. venezuelae</i><br><i>G. weberbaueri</i>                                                                                                                                                                                    |
| 55 | 5.01 | 244, 315 | C <sub>15</sub> H <sub>10</sub> O <sub>6</sub>  | [M-H] <sup>-</sup> | 285.0404 | 285.0405 | 0.4 | 211, 183, 149, 121 | 3 | 3,6,2',3'-Tetrahydroxyflavone | Flavone aglycones    | <i>G. aculeata</i><br><i>G. amplexifolia</i><br><i>G. angustifolia</i><br><i>G. angustifolia</i><br>biotype <i>San calixto</i><br><i>G. angustifolia</i> var.<br><i>bicolor</i><br><i>G. incana</i><br><i>G. superba</i><br><i>G. uncinata</i><br><i>G. venezuelae</i><br><i>G. weberbaueri</i> |

|    |      |          |                                                |                    |          |          |     |                              |   |                                        |                    |                                                                                                                                                                                                                                                                                                 |       |
|----|------|----------|------------------------------------------------|--------------------|----------|----------|-----|------------------------------|---|----------------------------------------|--------------------|-------------------------------------------------------------------------------------------------------------------------------------------------------------------------------------------------------------------------------------------------------------------------------------------------|-------|
| 56 | 5.03 | 245, 319 | C <sub>15</sub> H <sub>10</sub> O <sub>5</sub> | [M-H] <sup>-</sup> | 269.0455 | 269.0461 | 2.2 | 239, 211, 187, 143, 117      | 3 | 6,7,4'-Trihydroxyisoflavone            | Flavone aglycones  | <i>G. aculeata</i><br><i>G. amplexifolia</i><br><i>G. angustifolia</i><br><i>G. angustifolia</i><br>biotype <i>San calixto</i><br><i>G. angustifolia</i> var.<br><i>bicolor</i><br><i>G. incana</i><br><i>G. superba</i><br><i>G. uncinata</i><br><i>G. venezuelae</i><br><i>G. weberbaueri</i> |       |
| 57 | 5.04 | 269, 354 | C <sub>15</sub> H <sub>10</sub> O <sub>6</sub> | [M-H] <sup>-</sup> | 285.0404 | 285.0420 | 5.6 | 255, 227, 187, 159, 143, 117 | 2 | Kaempferol                             | Flavonol aglycones | <i>G. aculeata</i><br><i>G. angustifolia</i> var.<br><i>bicolor</i><br><i>G. incana</i><br><i>G. superba</i><br><i>G. uncinata</i><br><i>G. venezuelae</i><br><i>G. weberbaueri</i>                                                                                                             | 18,19 |
| 58 | 5.09 | 245, 319 | C <sub>17</sub> H <sub>14</sub> O <sub>7</sub> | [M-H] <sup>-</sup> | 329.0666 | 329.0671 | 1.5 | 271, 243, 227, 161, 133      | 3 | 4',5,7-Trihydroxy-3,6-dimethoxyflavone | Flavone aglycones  | <i>G. aculeata</i><br><i>G. amplexifolia</i><br><i>G. angustifolia</i><br><i>G. angustifolia</i><br>biotype <i>San calixto</i><br><i>G. angustifolia</i> var.<br><i>bicolor</i><br><i>G. incana</i><br><i>G. superba</i><br><i>G. uncinata</i>                                                  |       |

|           |      |          |                                                |                    |          |          |      |                              |   |                                    |                       |                             |
|-----------|------|----------|------------------------------------------------|--------------------|----------|----------|------|------------------------------|---|------------------------------------|-----------------------|-----------------------------|
|           |      |          |                                                |                    |          |          |      |                              |   |                                    | <i>G. venezuelae</i>  |                             |
|           |      |          |                                                |                    |          |          |      |                              |   |                                    | <i>G. weberbaueri</i> |                             |
| <b>59</b> | 5.12 | 244, 325 | C <sub>16</sub> H <sub>12</sub> O <sub>6</sub> | [M-H] <sup>-</sup> | 299.0561 | 299.0561 | 0.0  | 256, 227, 212, 183, 151      | 3 | 3,5,7-Trihydroxy-4'-methoxyflavone | Flavone aglycones     | <i>G. aculeata</i>          |
|           |      |          |                                                |                    |          |          |      |                              |   |                                    |                       | <i>G. amplexifolia</i>      |
|           |      |          |                                                |                    |          |          |      |                              |   |                                    |                       | <i>G. angustifolia</i>      |
|           |      |          |                                                |                    |          |          |      |                              |   |                                    |                       | <i>G. angustifolia</i>      |
|           |      |          |                                                |                    |          |          |      |                              |   |                                    |                       | biotype <i>San calixto</i>  |
|           |      |          |                                                |                    |          |          |      |                              |   |                                    |                       | <i>G. angustifolia</i> var. |
|           |      |          |                                                |                    |          |          |      |                              |   |                                    |                       | <i>bicolor</i>              |
|           |      |          |                                                |                    |          |          |      |                              |   |                                    |                       | <i>G. incana</i>            |
|           |      |          |                                                |                    |          |          |      |                              |   |                                    |                       | <i>G. superba</i>           |
|           |      |          |                                                |                    |          |          |      |                              |   |                                    |                       | <i>G. uncinata</i>          |
|           |      |          |                                                |                    |          |          |      |                              |   |                                    |                       | <i>G. venezuelae</i>        |
|           |      |          |                                                |                    |          |          |      |                              |   |                                    |                       | <i>G. weberbaueri</i>       |
| <b>60</b> | 5.15 | 244, 354 | C <sub>17</sub> H <sub>14</sub> O <sub>7</sub> | [M-H] <sup>-</sup> | 329.0666 | 329.0669 | 0.9  | 229, 271, 227, 215, 161      | 2 | Tricin                             | Flavone aglycones     | <i>G. incana</i>            |
|           |      |          |                                                |                    |          |          |      |                              |   |                                    |                       | <i>G. superba</i>           |
|           |      |          |                                                | [M+H] <sup>+</sup> | 331.0823 | 331.0820 | -0.9 | 313, 285, 270, 258, 203, 153 |   |                                    |                       | <i>G. uncinata</i>          |
|           |      |          |                                                |                    |          |          |      |                              |   |                                    |                       | <i>G. venezuelae</i>        |
|           |      |          |                                                |                    |          |          |      |                              |   |                                    |                       | <i>G. weberbaueri</i>       |

<sup>a</sup> The references described compounds found in the literature for leaves, culms, and shoots of several bamboos' plants and database sources such as PubChem, METLIN, KEGG, GNPS; <sup>st</sup> The identification of compounds has been verified by using authentic standards; <sup>sh</sup> shoulder peak; *m/z* data were obtained by UHPLC-QTOF-MS based on time and peak areas.  $\lambda_{\max}$ : UV maximum absorbance wavelength. Phytochemicals were annotated with identification confidence levels as recommended by the Metabolomics Standards Initiative (MSI) according to: Level 0: *Unambiguous 3D Structure: isolated, pure compound, including full stereochemistry*; Level 1: *Confident 2D structure: uses reference standard match or full 2D structure elucidation*; Level 2: *Probable structure: matched to literature data or databases by diagnostic evidence*, Level 3: *Possible structure or class: most likely structure, isomers possible, substance class or substructure match*; Level 4: *Unknown feature of interest*.<sup>21</sup>

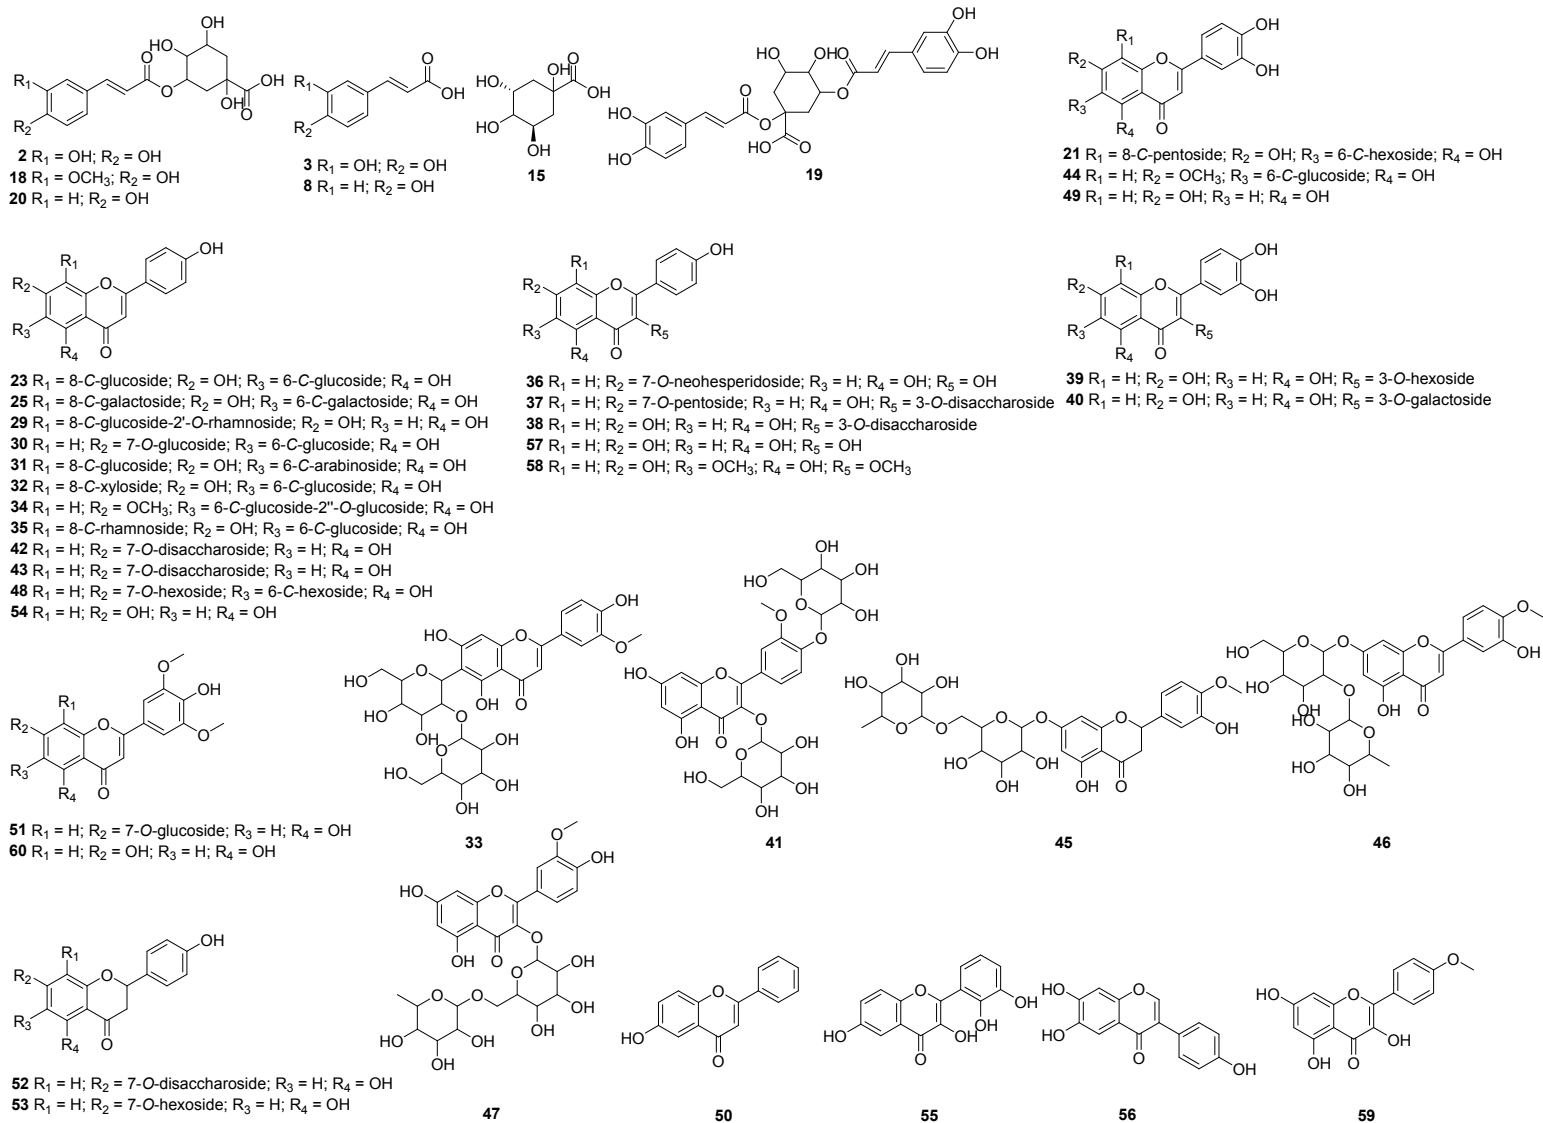

**Figure S2.** Chemical structures of the metabolites were found in BLEs.

### Compound 2

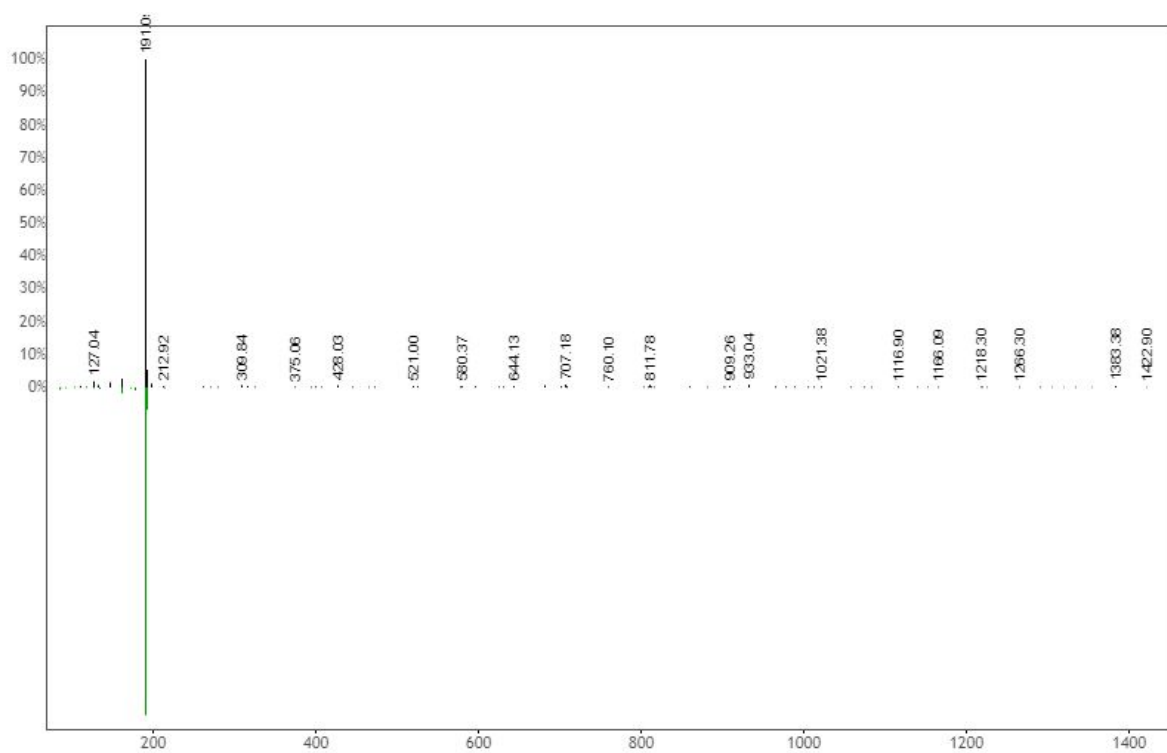

### Compound 8

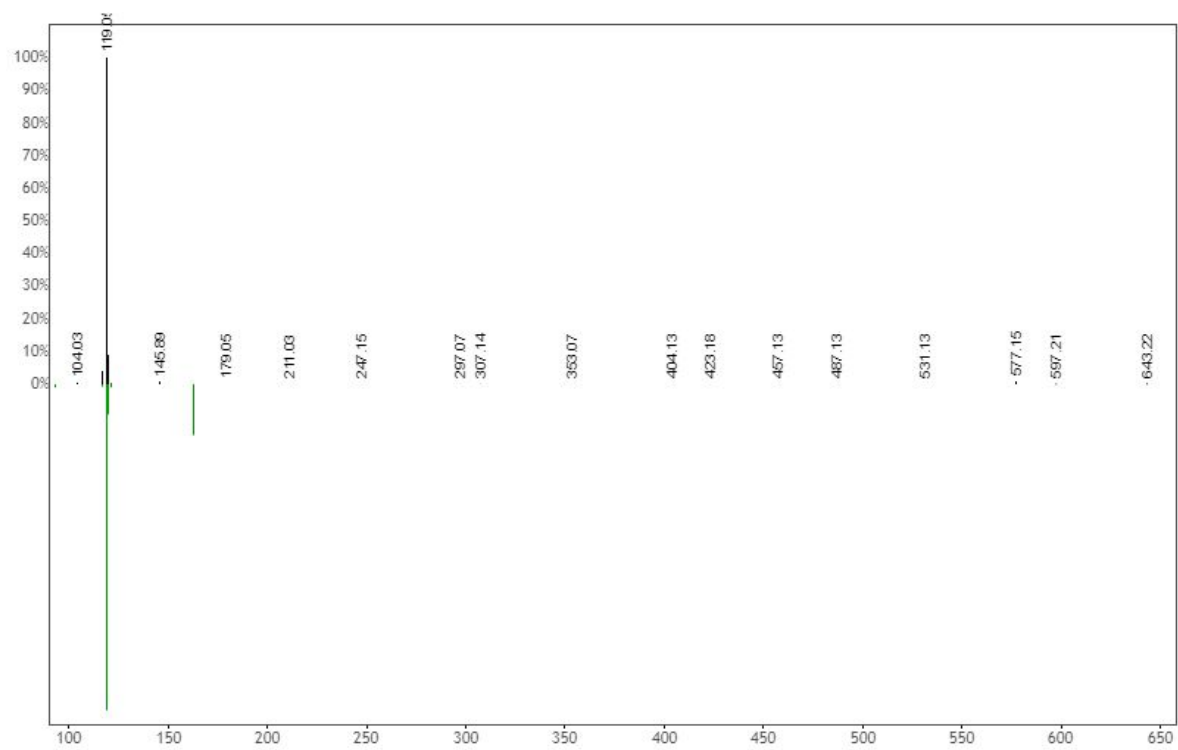

### Compound 18

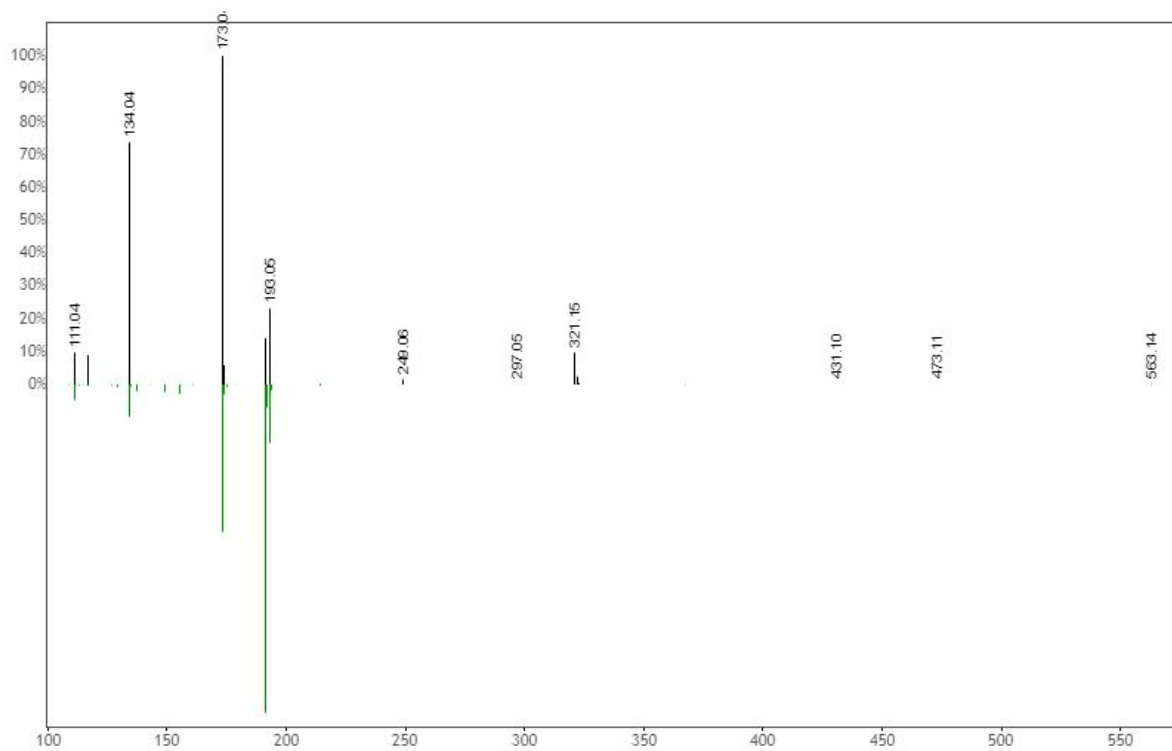

Compound 19

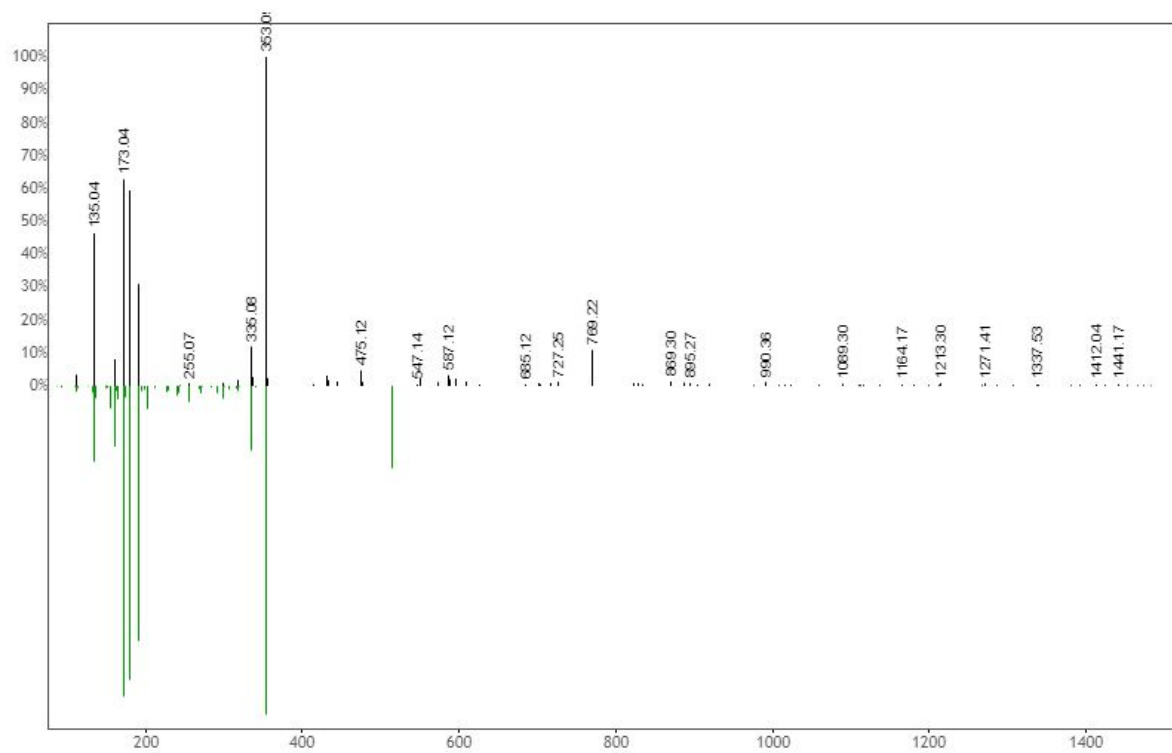

Compound 20

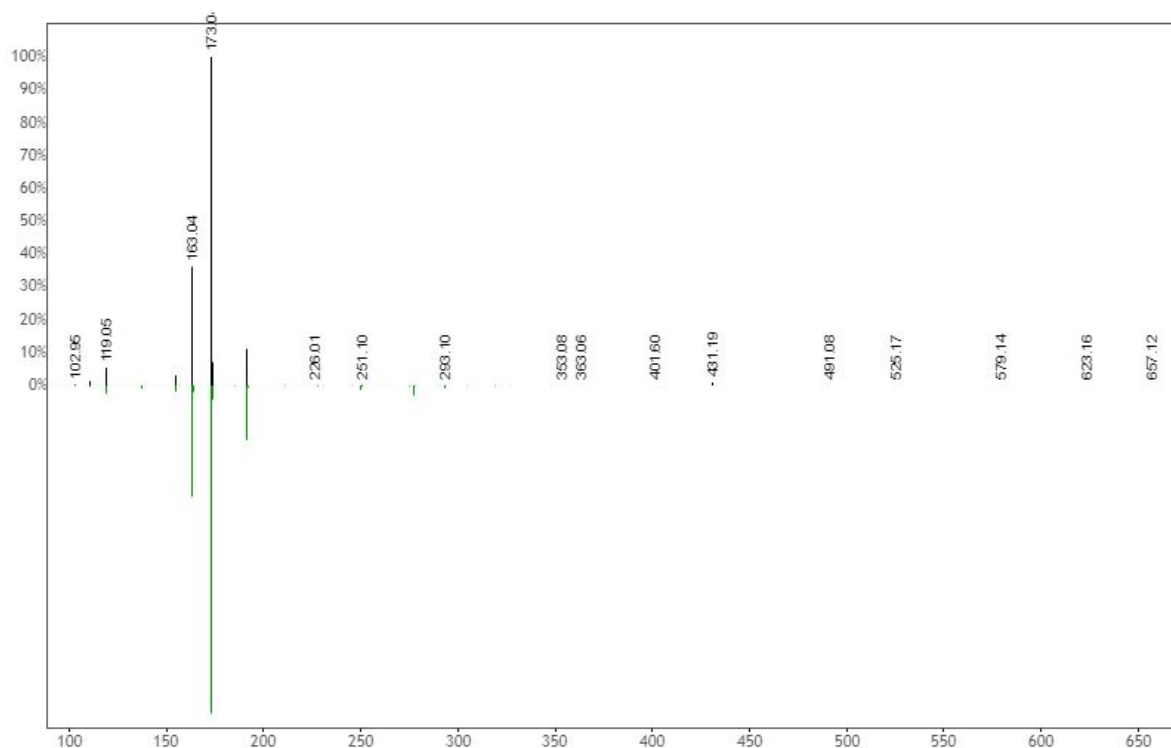

Compound 23

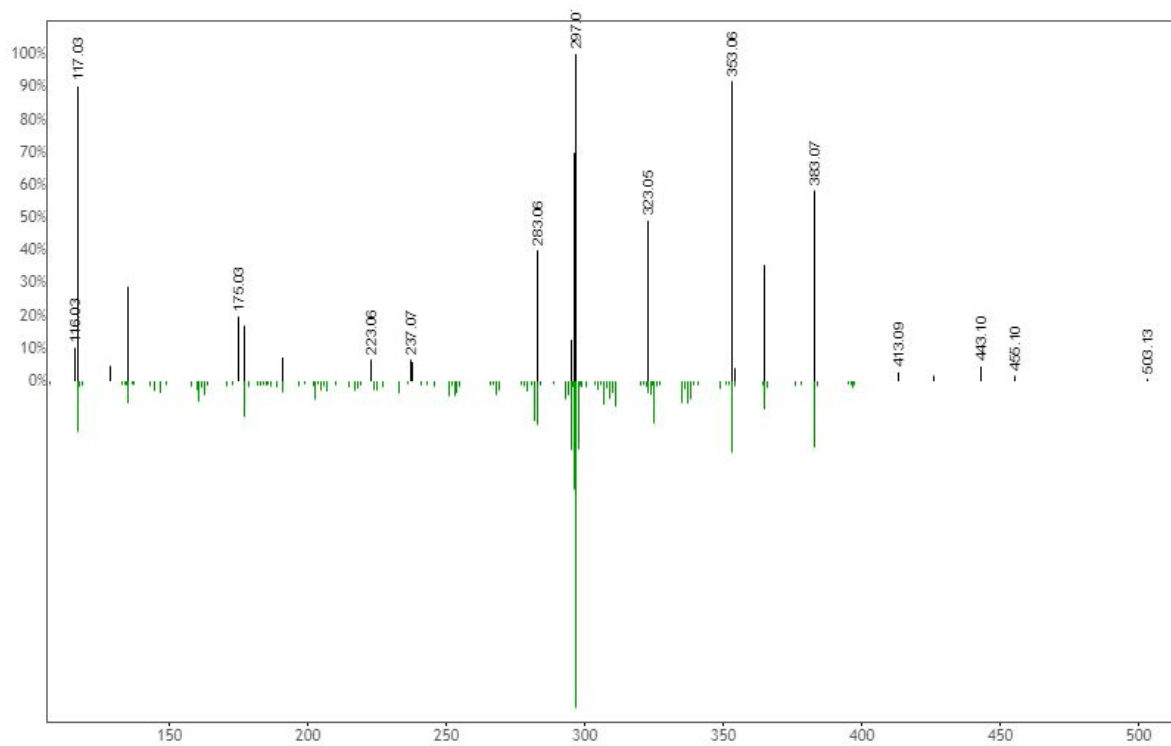

Compound 25



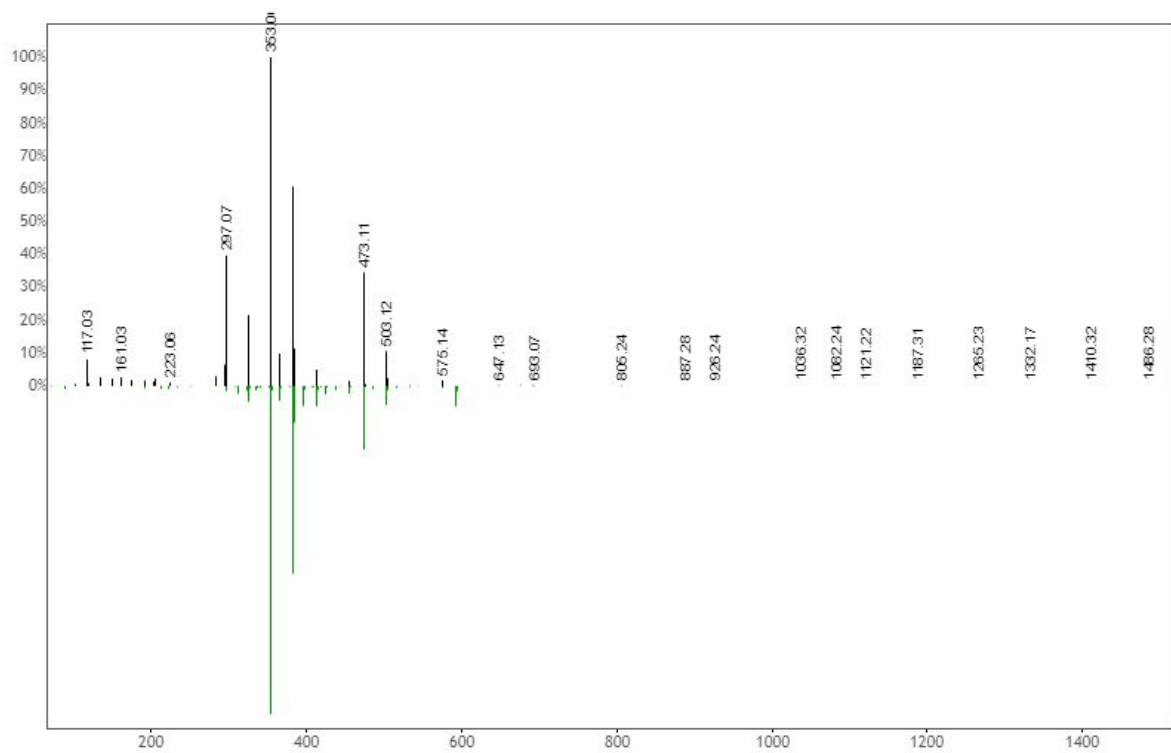

Compound 29

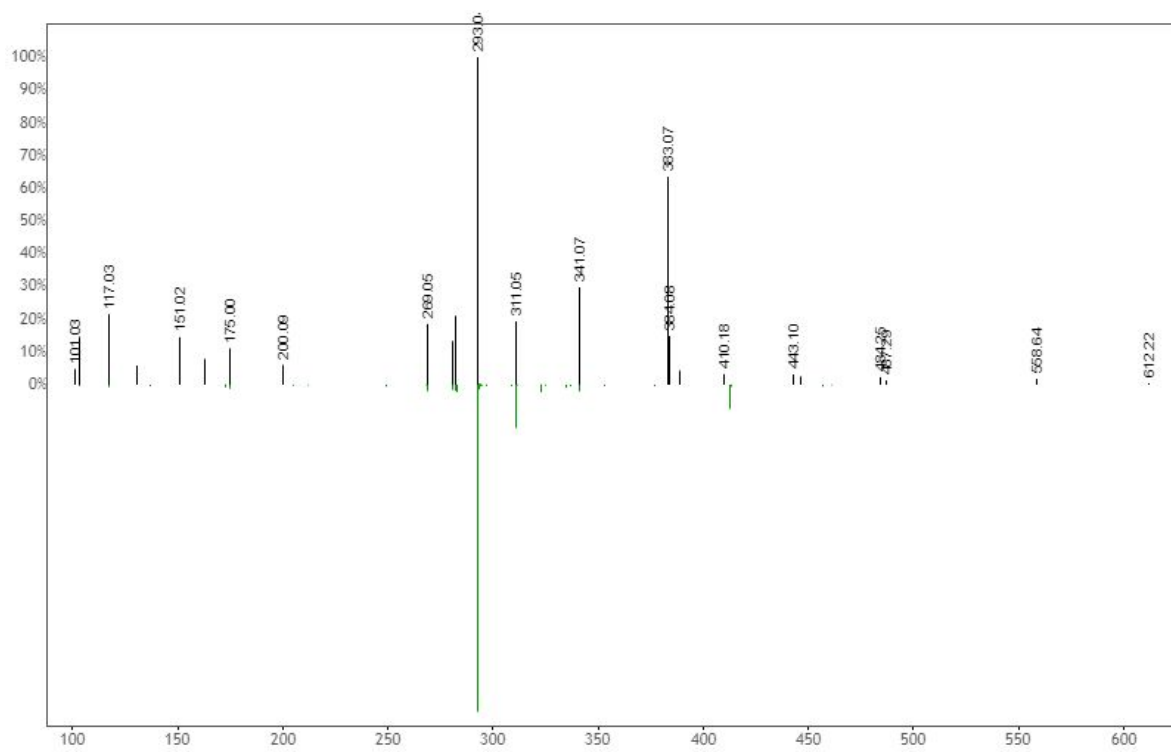

Compound 30

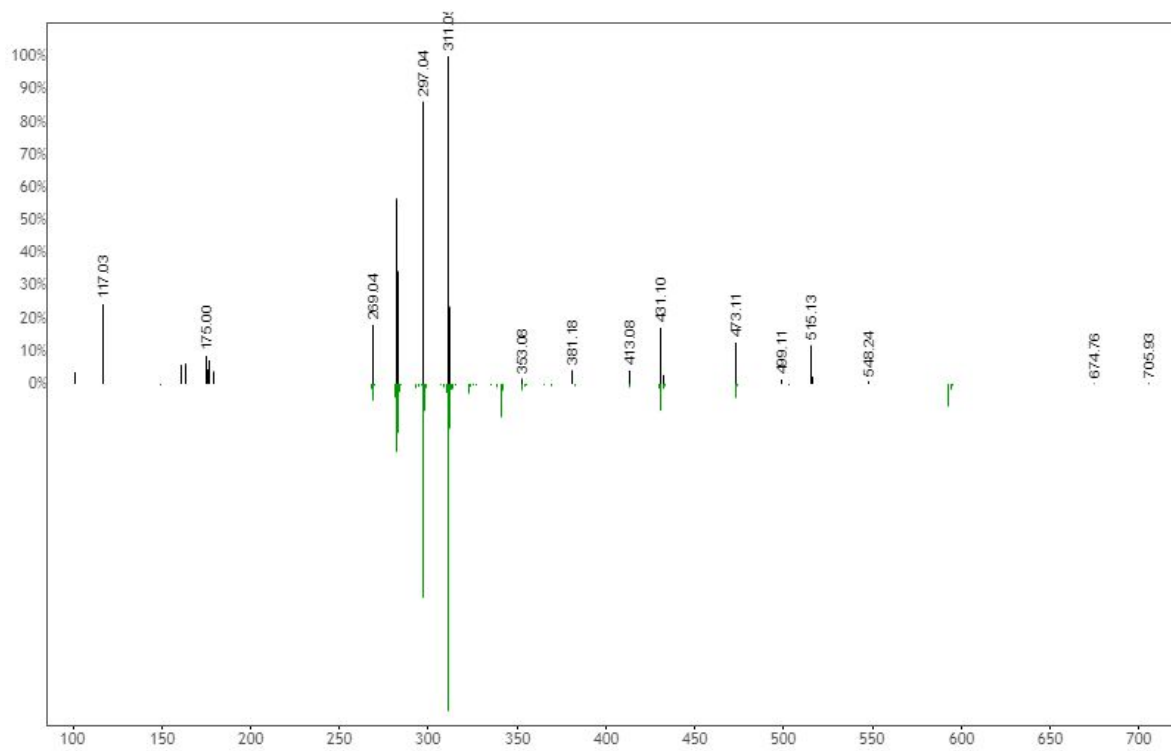

Compound 31

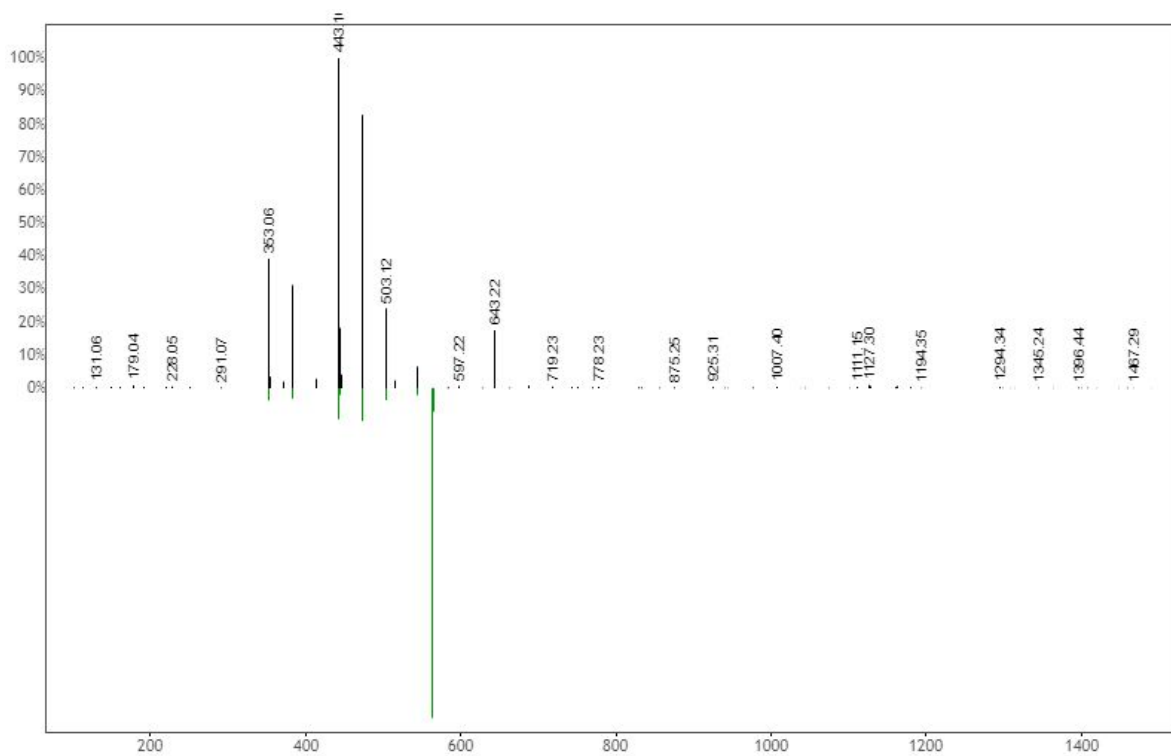

Compound 36

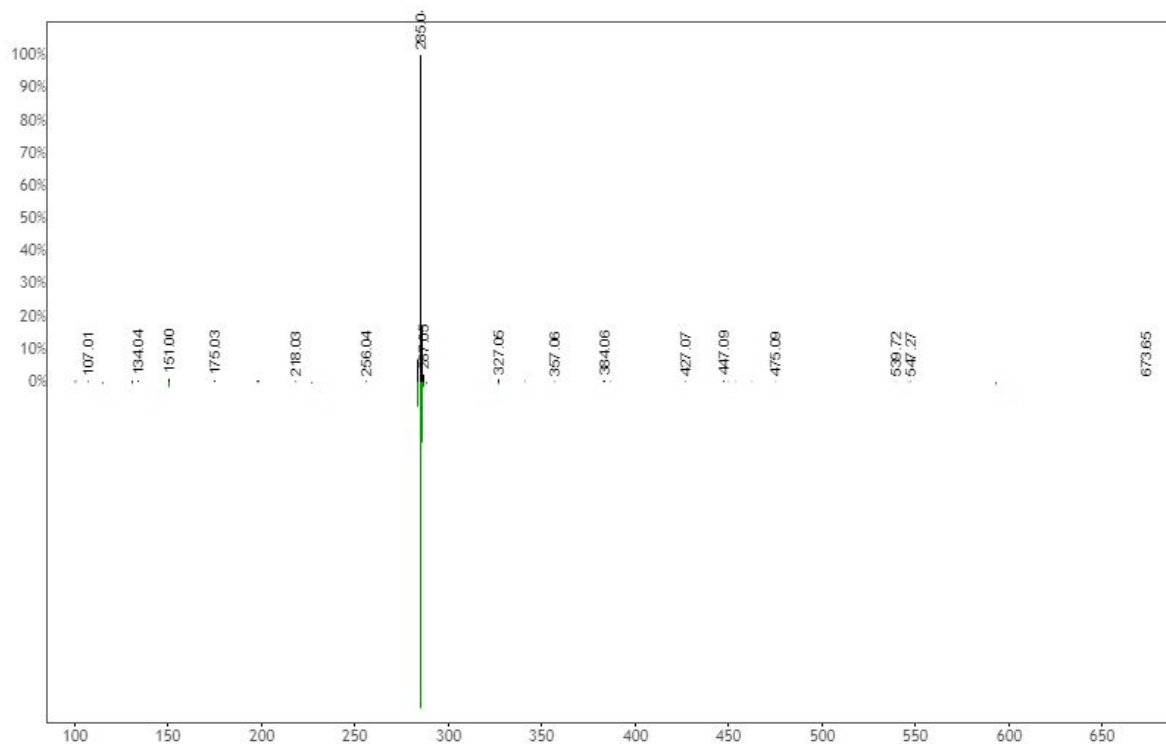

**Figure S3.** MS<sup>2</sup> spectrum match feature of GNPS showing the similarity of fragments patterns of the experimental and library data.

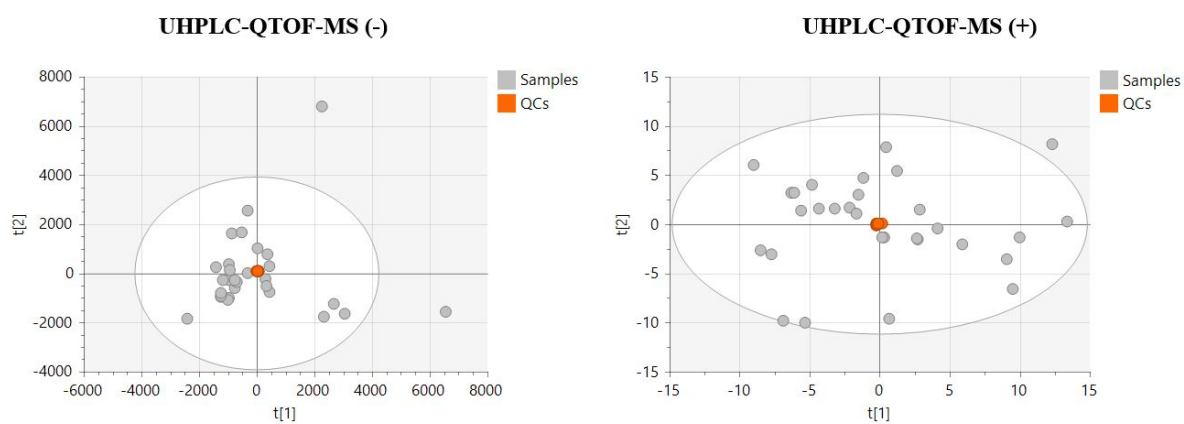

**Figure S4.** PCA score plot including Quality Controls (QCs) and all samples from UHPLC-QTOF-MS analysis in both negative and positive ion mode.

**Table S2.** List and information on the environmental variables of collection of the *Guadua* species used for the study.

| Species                                          | Sample code    | Location     | Collection date | Latitude | Longitude | Altitude | AMAT (°C) | AMET (°C) | AMIT (°C) | MP (mm) | RH (%) |
|--------------------------------------------------|----------------|--------------|-----------------|----------|-----------|----------|-----------|-----------|-----------|---------|--------|
| <i>G. aculeata</i> Rupr. ex E. Fourn.            | <i>Gac-Q1</i>  | Quindío      | 12/2021         | 4.52086  | -75.80102 | 1256     | 28.0      | 24.0      | 21.0      | 200-300 | 82.0   |
| <i>G. amplexifolia</i> J.Presl                   | <i>Gam-Q1</i>  | Quindío      | 03/2021         | 4.52083  | -75.80108 | 1256     | 28.0      | 24.0      | 21.0      | 200-300 | 82.0   |
|                                                  | <i>Gam-Q2</i>  | Quindío      | 12/2021         | 4.52083  | -75.80108 | 1256     | 28.0      | 24.0      | 21.0      | 200-300 | 82.0   |
|                                                  | <i>Gam-Q3</i>  | Quindío      | 12/2021         | 4.52083  | -75.80108 | 1256     | 28.0      | 24.0      | 21.0      | 200-300 | 82.0   |
| <i>G. angustifolia</i> Kunth                     | <i>Gan-C1</i>  | Cundinamarca | 09/2020         | 5.18127  | -74.19519 | 1343     | 31.5      | 25.5      | 23.5      | 100-200 | 82.5   |
|                                                  | <i>Gan-C2</i>  | Cundinamarca | 09/2020         | 5.18127  | -74.19519 | 1343     | 31.5      | 25.5      | 23.5      | 100-200 | 82.5   |
|                                                  | <i>Gan-C3</i>  | Cundinamarca | 09/2020         | 5.18127  | -74.19519 | 1343     | 31.5      | 25.5      | 23.5      | 100-200 | 82.5   |
|                                                  | <i>Gan-C4</i>  | Cundinamarca | 10/2022         | 5.18127  | -74.19519 | 1343     | 31.5      | 25.5      | 23.5      | 100-200 | 82.5   |
|                                                  | <i>Gan-C5</i>  | Cundinamarca | 09/2020         | 5.18127  | -74.19519 | 1343     | 31.5      | 25.5      | 23.5      | 100-200 | 82.5   |
|                                                  | <i>Gan-C6</i>  | Cundinamarca | 09/2020         | 5.18127  | -74.19519 | 1343     | 31.5      | 25.5      | 23.5      | 100-200 | 82.5   |
|                                                  | <i>Gan-C7</i>  | Cundinamarca | 10/2021         | 5.18127  | -74.19519 | 1343     | 31.5      | 25.5      | 23.5      | 100-200 | 82.5   |
| <i>G. angustifolia</i> Kunth biotype San Calixto | <i>Gan-N1</i>  | Nariño       | 06/2021         | 1.37383  | -77.27988 | 1857     | 20.6      | 17.5      | 12.3      | 100-200 | 60.0   |
|                                                  | <i>Gan-N2</i>  | Nariño       | 12/2021         | 1.32755  | -77.48088 | 1720     | 21.8      | 16.8      | 13.6      | 100-200 | 65.0   |
|                                                  | <i>Gan-N3</i>  | Nariño       | 12/2021         | 1.32755  | -77.48088 | 1720     | 21.8      | 16.8      | 13.6      | 100-200 | 65.0   |
|                                                  | <i>Gan-N4</i>  | Nariño       | 01/2022         | 1.32755  | -77.48088 | 1720     | 21.8      | 16.8      | 13.6      | 100-200 | 65.0   |
|                                                  | <i>Gan-N5</i>  | Nariño       | 01/2022         | 1.54900  | -78.67738 | 21       | 28.0      | 26.0      | 24.0      | 200-300 | 85.0   |
|                                                  | <i>Gan-N6</i>  | Nariño       | 01/2022         | 1.54900  | -78.67738 | 21       | 28.0      | 26.0      | 24.0      | 200-300 | 85.0   |
| <i>G. angustifolia</i> Kunth biotype San Calixto | <i>Gan-Q1</i>  | Quindío      | 12/2021         | 4.52053  | -75.79973 | 1256     | 28.0      | 24.0      | 21.0      | 200-300 | 82.0   |
|                                                  | <i>Gan-Q2</i>  | Quindío      | 04/2022         | 4.52053  | -75.79973 | 1256     | 28.0      | 24.0      | 21.0      | 200-300 | 82.0   |
| <i>G. angustifolia</i> Kunth biotype San Calixto | <i>Ganc-Q1</i> | Quindío      | 04/2022         | 4.52063  | -75.80041 | 1256     | 29.0      | 23.0      | 18.0      | 200-300 | 80.0   |

|                                                    |                |          |         |         |           |      |      |      |      |         |      |
|----------------------------------------------------|----------------|----------|---------|---------|-----------|------|------|------|------|---------|------|
| <i>G. angustifolia</i> var. <i>bicolor</i> Londoño | <i>Ganb-Q1</i> | Quindío  | 04/2022 | 4.52018 | -75.80056 | 1256 | 29.0 | 23.0 | 18.0 | 200-300 | 80.0 |
| <i>G. incana</i> Londoño                           | <i>Gin-P1</i>  | Putumayo | 12/2021 | 1.17730 | -76.66477 | 604  | 26.0 | 22.5 | 20.0 | 100-200 | 85.0 |
|                                                    | <i>Gin-Q1</i>  | Quindío  | 03/2021 | 4.52102 | -75.80013 | 1256 | 28.0 | 24.0 | 21.0 | 200-300 | 82.0 |
|                                                    | <i>Gin-Q2</i>  | Quindío  | 12/2021 | 4.52102 | -75.80013 | 1256 | 28.0 | 24.0 | 21.0 | 200-300 | 82.0 |
| <i>G. superba</i> Huber                            | <i>Gsu-Q1</i>  | Quindío  | 04/2022 | 4.52100 | -75.80036 | 1256 | 29.0 | 23.0 | 18.0 | 200-300 | 80.0 |
| <i>G. uncinata</i> Londoño & L.G.Clark             | <i>Gun-Q1</i>  | Quindío  | 03/2021 | 4.51816 | -75.80033 | 1256 | 28.0 | 24.0 | 21.0 | 200-300 | 82.0 |
|                                                    | <i>Gun-Q2</i>  | Quindío  | 12/2021 | 4.51816 | -75.80033 | 1256 | 28.0 | 24.0 | 21.0 | 200-300 | 82.0 |
|                                                    | <i>Gun-Q3</i>  | Quindío  | 12/2021 | 4.51816 | -75.80033 | 1256 | 28.0 | 24.0 | 21.0 | 200-300 | 82.0 |
| <i>G. venezuelae</i> Munro                         | <i>Gve-Q1</i>  | Quindío  | 04/2022 | 4.52057 | -75.80005 | 1256 | 29.0 | 23.0 | 18.0 | 200-300 | 80.0 |
| <i>G. weberbaueri</i> Pilg.                        | <i>Gwe-Q1</i>  | Quindío  | 04/2022 | 4.52043 | -75.80057 | 1256 | 29.0 | 23.0 | 18.0 | 200-300 | 80.0 |

---

Annual Maximum Temperature (AMAT), Annual Mean Temperature (AMET), Annual Minimum Temperature (AMIT), Monthly Precipitation (MP), and Relative Humidity (RH).

**Table S3.** Comparison of retention times of reference standards between HPLC-DAD and UHPLC-QTOF-MS analyses.

| No | Chemical standard         | Chemical class                   | UV $\lambda_{\text{max}}$<br>(nm) | Molecular<br>formula                            | $t_R$ (min)<br>HPLC <sup>a</sup> | $t_R$ (min)<br>UHPLC <sup>b</sup> | Exact mass | [M-H] <sup>-</sup> | [M+H] <sup>+</sup> |
|----|---------------------------|----------------------------------|-----------------------------------|-------------------------------------------------|----------------------------------|-----------------------------------|------------|--------------------|--------------------|
| 1  | Gallic acid               | Organic acid                     | 275                               | C <sub>7</sub> H <sub>6</sub> O <sub>5</sub>    | 4.36                             | 1.09                              | 170.0215   | 169.0132           | -                  |
| 2  | Chlorogenic acid<br>(CGA) | Cinnamic acid and<br>derivatives | 275sh, 325                        | C <sub>16</sub> H <sub>18</sub> O <sub>9</sub>  | 7.72                             | 2.42                              | 354.3095   | 353.0863           | -                  |
| 3  | Caffeic acid              | Cinnamic acid and<br>derivatives | 275                               | C <sub>9</sub> H <sub>8</sub> O <sub>4</sub>    | 9.08                             | 2.55                              | 180.0422   | 179.0344           | -                  |
| 4  | Isoorientin               | Flavone glycosides               | 274, 355                          | C <sub>21</sub> H <sub>20</sub> O <sub>11</sub> | 9.39                             | 2.96                              | 448.3775   | 447.0954           | 449.1094           |
| 5  | Ampelopsin                | Flavanonol aglycones             | 300                               | C <sub>15</sub> H <sub>12</sub> O <sub>8</sub>  | 9.88                             | 2.88                              | 320.0532   | 319.0458           | -                  |
| 6  | Rutin                     | Flavonol glycosides              | 274, 355                          | C <sub>27</sub> H <sub>30</sub> O <sub>16</sub> | 10.42                            | 3.20                              | 610.1533   | 609.1531           | 611.1603           |
| 7  | Vitexin                   | Flavone glycosides               | 273, 335                          | C <sub>21</sub> H <sub>20</sub> O <sub>10</sub> | 10.56                            | 3.26                              | 432.1056   | 431.0923           | 433.1123           |
| 8  | <i>p</i> -Coumaric acid   | Cinnamic acid and<br>derivatives | 295sh, 310                        | C <sub>9</sub> H <sub>8</sub> O <sub>3</sub>    | 11.15                            | 3.36                              | 164.0473   | 163.0390           | -                  |
| 9  | Sinapinic acid            | Cinnamic acid and<br>derivatives | 325                               | C <sub>11</sub> H <sub>12</sub> O <sub>5</sub>  | 11.55                            | 3.78                              | 224.2101   | 223.0684           | -                  |
| 10 | Morin                     | Flavonol aglycones               | 264, 354                          | C <sub>15</sub> H <sub>10</sub> O <sub>7</sub>  | 14.79                            | 4.19                              | 302.0426   | 301.0351           | 303.0512           |
| 11 | Coumarin                  | Coumarins                        | 275, 325                          | C <sub>9</sub> H <sub>6</sub> O <sub>2</sub>    | 15.19                            | 4.35                              | 146.1432   | -                  | 147.0377           |
| 12 | Quercetin                 | Flavonol aglycones               | 275, 358                          | C <sub>15</sub> H <sub>10</sub> O <sub>7</sub>  | 15.86                            | 4.49                              | 302.0426   | 301.0344           | 303.0494           |
| 13 | Cinnamic acid             | Cinnamic acid and<br>derivatives | 275                               | C <sub>9</sub> H <sub>8</sub> O <sub>2</sub>    | 16.84                            | 4.63                              | 148.1597   | 147.0524           | -                  |
| 14 | Naringenin                | Flavanone aglycones              | 275, 325                          | C <sub>15</sub> H <sub>12</sub> O <sub>5</sub>  | 17.75                            | 4.93                              | 272.0684   | 271.0611           | 273.0764           |

<sup>a</sup> Column: Luna C18 column (150 x 4.6 mm, 5  $\mu\text{m}$ , 100  $\text{\AA}$ )

<sup>b</sup> Column: ACQUITY UPLC HSS T3 C18 column (2.1  $\times$  100 mm, 1.8  $\mu\text{m}$ )

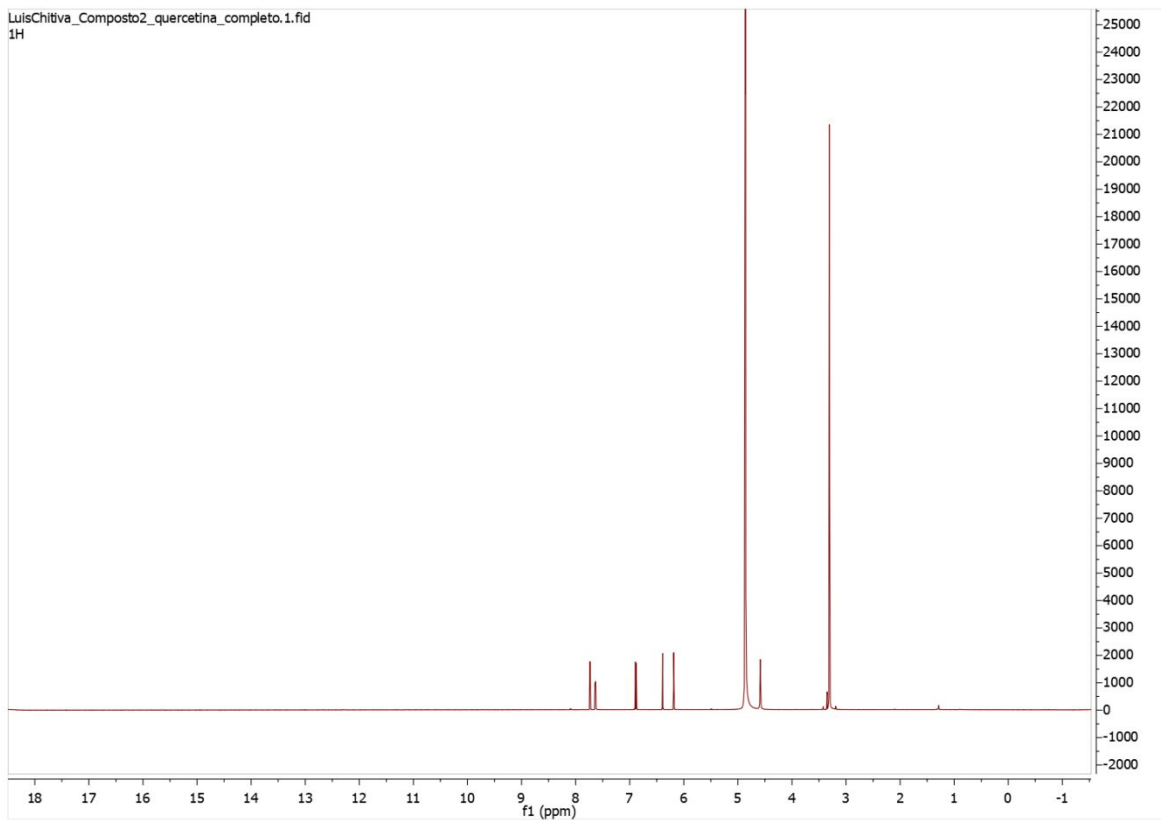

**Figure S5.**  $^1\text{H}$ -NMR spectra obtained for quercetin.

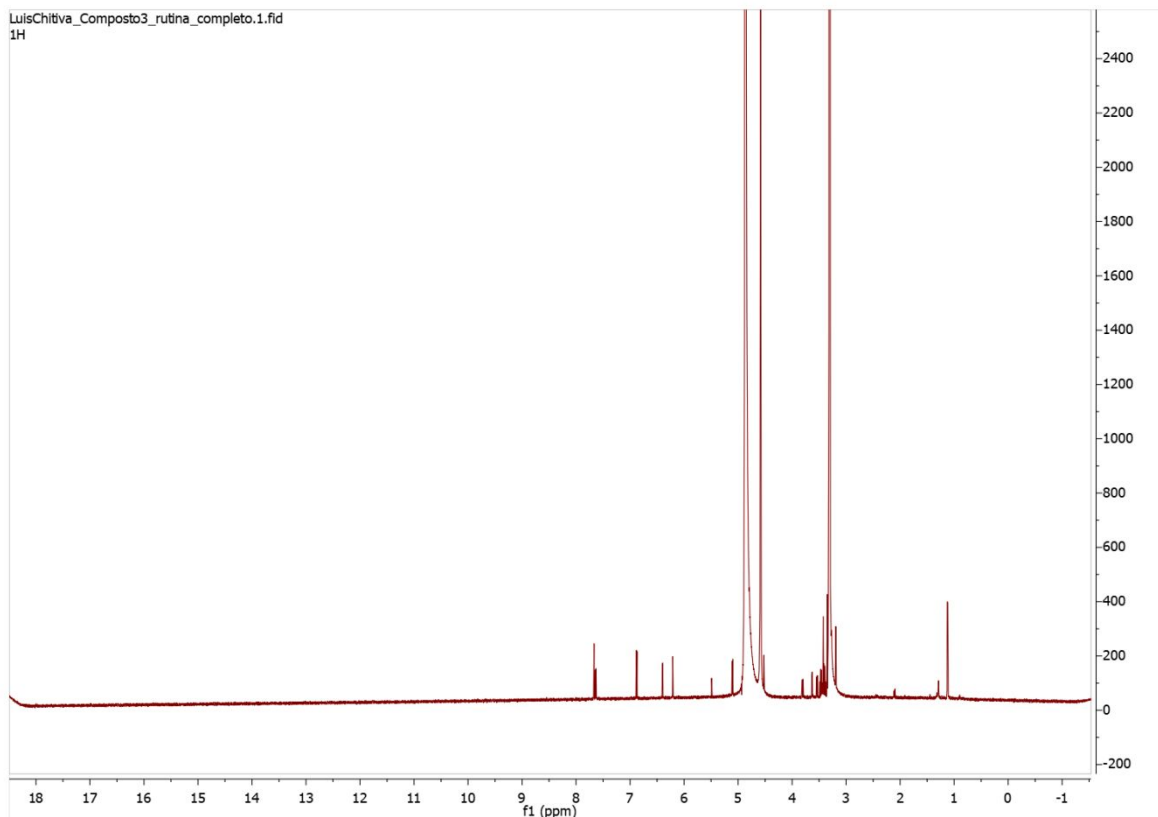

**Figure S6.**  $^1\text{H}$ -NMR spectra obtained for rutin.

**Table S4.** Parameters used in the GNPS Classical Molecular Networking.

| GNPS Classical Molecular Networking |                                                                                                                                                                                               |
|-------------------------------------|-----------------------------------------------------------------------------------------------------------------------------------------------------------------------------------------------|
| Processing step                     | Parameters                                                                                                                                                                                    |
| Basic options                       | Classical Molecular Networking<br>Precursor Ion Mass Tolerance: 0.02 Da<br>Fragment Ion Mass Tolerance: 0.02 Da                                                                               |
| Advance Network Options             | Min Pair Cos: 0.6<br>Network TopK: 10<br>Maximum Connected Component Size: 100<br>Minimum Matched Fragment Ions: 4<br>Minimum Cluster Size: 2<br>Maximum shift: 1999 Da<br>Run MScluster: yes |
| Advance Library Search Options      | Library Search Min Matched Peaks: 4<br>Search Analogs: Do Search<br>Score Threshold: 0.6<br>Maximum Analog Search Mass Difference: 100 Da                                                     |



**Table S5.** Parameters used in the MZmine 2.53 software for processing the data obtained by UHPLC-QTOF-MS.

| <b>MZmine version 2.53 software</b> |                                                                                                                                                                                                                                                           |
|-------------------------------------|-----------------------------------------------------------------------------------------------------------------------------------------------------------------------------------------------------------------------------------------------------------|
| <b>Preprocessing step</b>           | <b>Parameters</b>                                                                                                                                                                                                                                         |
| <b>Feature detection</b>            | <i>Mass Detection</i><br>MS level: 1<br>Set filters<br>Retention time: 0.2 - 10 min<br>Mass detector: Centroid<br>Noise level: 1E3<br>MS level: 2<br>Set filters<br>Retention time: 0.2 - 10 min<br>Mass detector: Centroid<br>Noise level: 1E2           |
| <b>Chromatogram builder</b>         | <i>ADAP Chromatogram Builder</i><br>MS level: 1<br>Min group size in # of scans: 5<br>Group intensity threshold: 1E3<br>Min highest intensity: 3E3<br><i>m/z</i> tolerance: 0 <i>m/z</i> or 20 ppm                                                        |
| <b>Deconvolution</b>                | <i>Chromatogram deconvolution</i><br>Algorithm: Baseline cut-off<br>Min peak height: 1E3<br>Peak duration range (min): 0 to 3 min<br>Baseline level: 1E3<br><i>m/z</i> range for MS2 scan pairing (Da): 0.01<br>RT range for MS2 scan pairing (min): 0.02 |
| <b>Isotopes</b>                     | <i>Isotopic peaks grouper</i><br><i>m/z</i> tolerance: 0 <i>m/z</i> or 20 ppm<br>Retention time tolerance: 0.02 min<br>Max charge: 2<br>Representative isotope: Most intense                                                                              |
| <b>Alignment</b>                    | <i>Join aligner</i><br><i>m/z</i> tolerance: 0 <i>m/z</i> or 20 ppm<br>Weight for <i>m/z</i> : 75<br>Retention time tolerance: 0.25 absolute (min)<br>Weight for RT: 25                                                                                   |
| <b>Filtering</b>                    | <i>Feature list rows filter</i><br>Minimum peaks in a row (X): 1<br>Minimum peaks in an isotope pattern (X): 1<br><i>m/z</i> range: 75 to 2000<br>Reset peak number ID: True<br>Keep only peaks with MS2 scan (GNPS): (X)                                 |
| <b>Gap Filling</b>                  | <i>Peak finder</i><br>Intensity tolerance: 10%<br><i>m/z</i> tolerance: 0 <i>m/z</i> or 10 ppm<br>RT tolerance: 0.05 min                                                                                                                                  |

|                           |                                                                                                                                                 |
|---------------------------|-------------------------------------------------------------------------------------------------------------------------------------------------|
| <b>Export</b>             | <i>Export to CSV file</i><br>(X) Export row<br>(X) Export row <i>m/z</i><br>(X) Export row retention time<br>(X) Peak area                      |
| <b>Formula prediction</b> | Charge: 2<br>Ionization type: M-H<br><i>m/z</i> tolerance: 0.01 <i>m/z</i> or 10 ppm<br>Max best formulas per peak: 3<br>O 50<br>H 100<br>C 100 |

**Table S6.** Parameters used in the NMRProcFlow software for processing the data obtained by <sup>1</sup>H-NMR.

| <b>NMRProcFlow</b>         |                                                                                                                                                                                                    |
|----------------------------|----------------------------------------------------------------------------------------------------------------------------------------------------------------------------------------------------|
| <b>Preprocessing step</b>  | <b>Parameters</b>                                                                                                                                                                                  |
| <b>PPM Calibration</b>     | <i>Range of the PPM reference:</i><br>Not applicable<br><i>PPM value of the center of resonance:</i><br>0<br><i>noisy PPM range:</i><br>10.5 10.2                                                  |
| <b>Normalization</b>       | <i>Normalization Method:</i><br>Constant Sum Normalization<br><i>Reference PPM ranges:</i><br>Not applicable                                                                                       |
| <b>Baseline correction</b> | <i>Type of Correction:</i><br>Local Correction<br><i>noisy PPM range:</i><br>10.5 10.2<br><i>Restricted PPM range:</i><br>Not applicable<br><i>Level of Correction:</i><br>1<br><i>Order:</i><br>1 |
| <b>Alignment</b>           | <i>Align. Method:</i><br>Least Square<br><i>Relative max. shift:</i><br>0.05<br><i>Reference spectrum:</i><br>Auto reference<br><i>PPM Ranges to align:</i><br>Not applicable                      |
| <b>PPM shift</b>           | <i>PPM shift value:</i><br>0<br><i>PPM Ranges to shift:</i><br>Not applicable                                                                                                                      |
| <b>Zeroing</b>             | <i>PPM Ranges to clean:</i><br>4.99 4.75                                                                                                                                                           |
| <b>Bucketing</b>           |                                                                                                                                                                                                    |

---

|                              |                           |
|------------------------------|---------------------------|
| Bucketing Method             | <i>Resolution Factor:</i> |
| <i>Intelligent Bucketing</i> | 0.5                       |
|                              | <i>SNR threshold:</i>     |
|                              | 3                         |
|                              | <i>noisy PPM range:</i>   |
|                              | 10.5 10.2                 |
|                              | <i>PPM Ranges:</i>        |
|                              | 10.0 0.0                  |

---

#### Data export

---

|             |                                    |
|-------------|------------------------------------|
| Data matrix | <i>Export Format:</i>              |
|             | Comma Separator Value (CSV)        |
|             | <i>SNR threshold:</i>              |
|             | 3                                  |
|             | <i>noisy PPM range:</i>            |
|             | 10.5 10.2                          |
|             | <i>Normalization Method:</i>       |
|             | Constant Sum Normalization         |
|             | <i>PPM range of the Reference:</i> |
|             | Not applicable                     |

---

#### Buckets table

---

|  |                             |
|--|-----------------------------|
|  | <i>Export Format:</i>       |
|  | Comma Separator Value (CSV) |

---

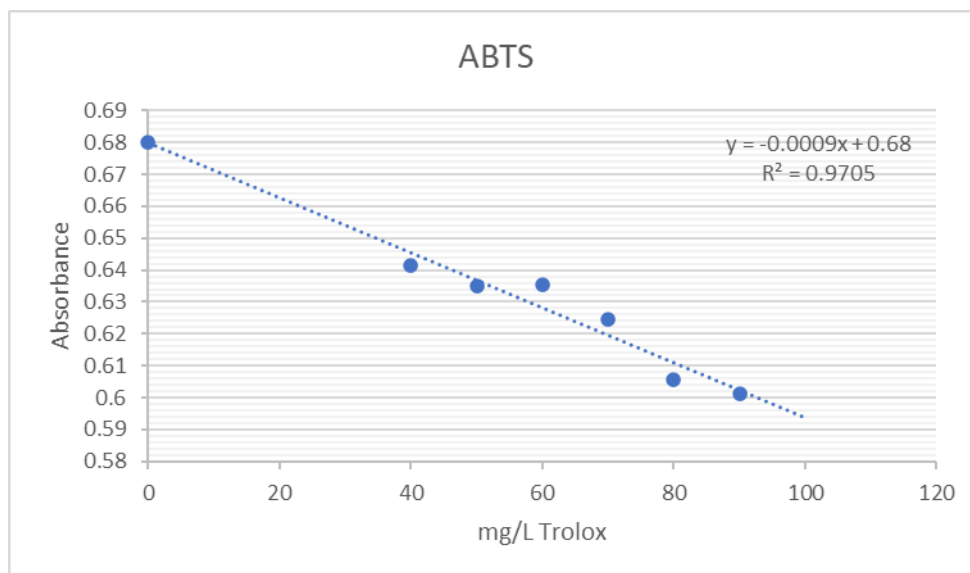

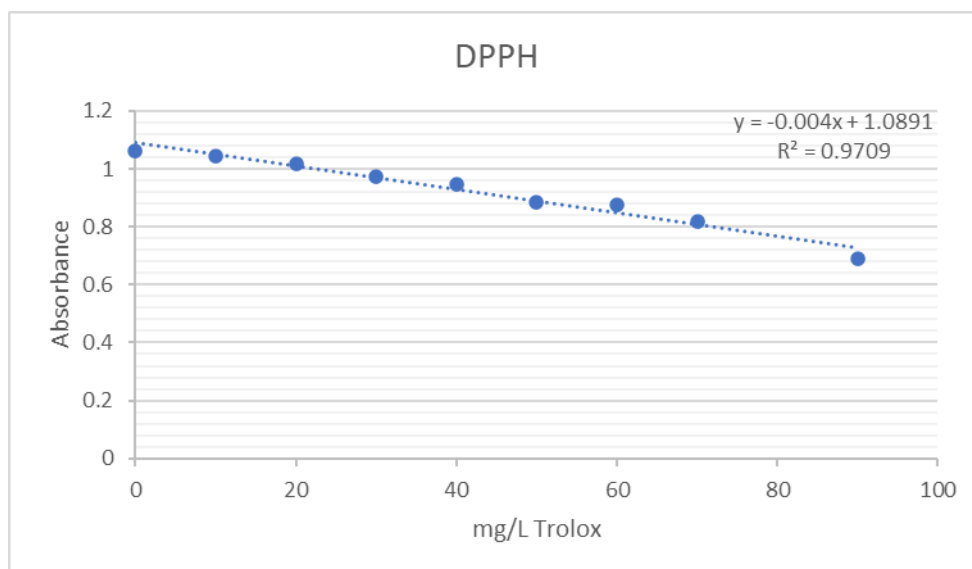

**Figure S7.** Calibration curves obtained for the determination of antioxidant capacity by ABTS and DPPH.

## References

- (1) Chitiva, L. C.; Lozano-Puentes, H. S.; Londoño, X.; Leño, T. F.; Cala, M. P.; Ruiz-Sanchez, E.; Díaz-Ariza, L. A.; Prieto-Rodríguez, J. A.; Castro-Gamboa, I.; Costa M, G. Untargeted Metabolomics Approach and Molecular Networking Analysis Reveal Changes in Chemical Composition under the Influence of Altitudinal Variation in Bamboo Species. *Front. Mol. Biosci.* **2023**, *10*, 1192088. <https://doi.org/10.3389/fmolb.2023.1192088>.
- (2) Cao, X.; Zhang, Y.; Xun, H.; Wang, J.; Tang, F. High-Yield Recovery of Antioxidant Compounds from *Bambusa Chungii* Culms Using Pressurized Hot Water Extraction. *Antioxidants* **2022**, *11* (11). <https://doi.org/10.3390/antiox11112231>.
- (3) Jiang, L.; Belwal, T.; Huang, H.; Ge, Z.; Limwachiranon, J.; Zhao, Y.; Li, L.; Ren, G.; Luo, Z. Extraction and Characterization of Phenolic Compounds from Bamboo Shoot Shell under Optimized Ultrasonic-Assisted Conditions: A Potential Source of Nutraceutical Compounds. *Food Bioprocess Technol.* **2019**, *12*, 1741–1755.
- (4) Wang, Y.; Chen, J.; Wang, D.; Ye, F.; He, Y.; Hu, Z.; Zhao, G. A Systematic Review on the Composition, Storage, Processing of Bamboo Shoots: Focusing the Nutritional and Functional Benefits. *J. Funct. Foods* **2020**, *71*, 104015.
- (5) Van Hoyweghen, L. Van; Beer, T. De; Deforce, D.; Heyerick, A. Phenolic Compounds and Anti-oxidant Capacity of Twelve Morphologically Heterogeneous Bamboo Species. *Phytochem. Anal.* **2012**, *23* (5), 433–443.
- (6) Van Hoyweghen, L.; Deforce, D.; Heyerick, A. Antioxidant Capacity and Secondary Metabolites of 12 Bamboo Species. In *I International Symposium on Genetic Resources of Bamboos and Palms and III International Symposium on Ornamental Palms 1003*; 2010; pp 107–112.
- (7) Haldipur, A. C.; Srividya, N. A Comparative Evaluation of in Vitro Antihyperglycemic Potential of Bamboo Seed Rice (*Bambusa Arundinacea*) and Garudan Samba (*Oryza Sativa*): An Integrated Metabolomics, Enzymatic and Molecular Docking Approach. *J.*

*Cereal Sci.* **2021**, *99*, 103200. <https://doi.org/10.1016/j.jcs.2021.103200>.

- (8) Gagliano, J.; Altenhofen, S.; Nabinger, D. D.; Gusso, D.; Kuhl-Silva, J. M.; Anselmo-Moreira, F.; Yamaguchi, L. F.; Kato, M. J.; Bonan, C. D.; Furlan, C. M. Are Brazilian Bamboo Species Helpful for Cognition and Memory? *Phytomedicine Plus* **2022**, *2* (1). <https://doi.org/10.1016/j.phyplu.2021.100183>.
- (9) Akhtar, J.; Patowary, L. *Bambusa Vulgaris*: A Comprehensive Review of Its Traditional Uses, Phytochemicals and Pharmacological Activities. *Sci. Phytochem.* **2022**, *1* (2), 11–21. <https://doi.org/10.58920/scipphy01020011>.
- (10) Hu, C.; Zhang, Y.; Kitts, D. D. Evaluation of Antioxidant and Prooxidant Activities of Bamboo *Phyllostachys Nigra* Var. *Henonis* Leaf Extract in Vitro. *J. Agric. Food Chem.* **2000**, *48* (8), 3170–3176. <https://doi.org/10.1021/jf0001637>.
- (11) Ni, Q.; Xu, G.; Wang, Z.; Gao, Q.; Wang, S.; Zhang, Y. Seasonal Variations of the Antioxidant Composition in Ground Bamboo *Sasa Argenteostriatus* Leaves. *Int. J. Mol. Sci.* **2012**, *13* (2), 2249–2262. <https://doi.org/10.3390/ijms13022249>.
- (12) Ma, N. H.; Guo, J.; Chen, S. H. X.; Yuan, X. R.; Zhang, T.; Ding, Y. Antioxidant and Compositional HPLC Analysis of Three Common Bamboo Leaves. *Molecules* **2020**, *25* (2), 409. <https://doi.org/10.3390/molecules25020409>.
- (13) Tanaka, A.; Zhu, Q.; Tan, H.; Horiba, H.; Ohnuki, K.; Mori, Y.; Yamauchi, R.; Ishikawa, H.; Iwamoto, A.; Kawahara, H.; Shimizu, K. Biological Activities and Phytochemical Profiles of Extracts from Different Parts of Bamboo (*Phyllostachys Pubescens*). *Molecules* **2014**, *19* (6), 8238–8260. <https://doi.org/10.3390/molecules19068238>.
- (14) Gagliano, J.; Anselmo-Moreira, F.; Sala-Carvalho, W. R.; Furlan, C. M. What Is Known about the Medicinal Potential of Bamboo? *Adv. Tradit. Med.* **2022**, *22* (3), 467–495. <https://doi.org/10.1007/s13596-020-00536-5>.
- (15) Ni, Q.; Wang, Z.; Xu, G.; Gao, Q.; Yang, D.; Morimatsu, F.; Zhang, Y. Altitudinal Variation of Antioxidant Components and Capability in *Indocalamus Latifolius* (Keng) McClure Leaf. *J. Nutr. Sci. Vitaminol. (Tokyo)*. **2013**, *59* (4), 336–342. <https://doi.org/10.3177/jnsv.59.336>.
- (16) Wang, Y.; Zhang, Y.; Cheng, J.; Zhao, J.; Shi, R.; He, L.; Li, Q.; Chen, Y. Efficient Purification of Flavonoids from Bamboo Shoot Residues of *Phyllostachys Edulis* by Macroporous Resin and Their Hypoglycemic Activity. *Food Chem. X* **2022**, *16*, 100505.
- (17) Silva de Oliveira, D. C. *Composição Química e Atividades Biológicas de Extratos de Guadua Angustifolia* Kunth, Universidade de São Paulo, 2019. <https://www.teses.usp.br/teses/disponiveis/9/9138/tde-22122021-132604/pt-br.php>.
- (18) Morales Noreña, N.; Sanchez Vallejo, L. *Contribución Al Estudio Fitoquímico de Las Hojas de Guadua Angustifolia* Kunth, Universidad del Quindío, 2008.
- (19) Li, X.; Tao, W.; Xun, H.; Yao, X.; Wang, J.; Sun, J.; Yue, Y.; Tang, F. Simultaneous Determination of Flavonoids from Bamboo Leaf Extracts Using Liquid Chromatography-Tandem Mass Spectrometry. *Rev. Bras. Farmacogn.* **2021**, *31*, 347–352.
- (20) Cheng, Y.; Wan, S.; Yao, L.; Lin, D.; Wu, T.; Chen, Y.; Zhang, A.; Lu, C. Bamboo Leaf: A Review of Traditional Medicinal Property, Phytochemistry, Pharmacology, and Purification Technology. *J. Ethnopharmacol.* **2023**, *306*, 116166. <https://doi.org/10.1016/j.jep.2023.116166>.

- (21) Blaženović, I.; Kind, T.; Ji, J.; Fiehn, O. Software Tools and Approaches for Compound Identification of LC-MS/MS Data in Metabolomics. *Metabolites*. 2018. <https://doi.org/10.3390/metabo8020031>.
